# Supplementary material
Source: PubMed Central journal article supplement (PMC6906943)
Supplement: ao9b03003_si_001.pdf [file ao9b03003_si_001.pdf]

## Supporting Information

### **Effects of Substituents on the Properties of Metal-Free MRI Contrast Agents**

*Ryoma Shiraishi,<sup>a</sup> Tomoyo Kaneko,<sup>b</sup> Kazuteru Usui,<sup>b\*</sup> Tatsuya Naganuma,<sup>c</sup> Naoko Iizuka,<sup>b</sup> Kosuke Morishita,<sup>a</sup> Shigeki Kobayashi,<sup>b</sup> Yasufumi Fuchi,<sup>b</sup> Yuta Matsuoka,<sup>a</sup> Go Hirai,<sup>a</sup> Ken-ichi Yamada,<sup>a</sup> and Satoru Karasawa<sup>b,d\*</sup>*

<sup>a</sup>Graduate School of Pharmaceutical Sciences Kyushu University Maidashi Higashi-ku, Fukuoka 812–8582 (Japan)

<sup>b</sup>Faculty of Pharmaceutical Sciences, Showa Pharmaceutical University Machida, Tokyo 194–0042 (Japan)

<sup>c</sup>Japan REDOX Limited, Development Department Director, Hakata-ku, Fukuoka, 812–0044 (Japan)

<sup>d</sup>Japan Science and Technology Agency, Kawaguchi, 332–0012 (Japan)

Corresponding author: Satoru Karasawa (SK) and Kazuteru Usui (KU)

E-mail: karasawa@ac.shoyaku.ac.jp (SK) and usui@ac.shoyaku.ac.jp (KU)

Tel: +81–42–721–1553

Fax: +81–42–721–1554

## Table of Contents

|                                                                                                          |           |
|----------------------------------------------------------------------------------------------------------|-----------|
| 1. Molecular structures consisted of UBD frameworks carrying stable radicals.                            | S3        |
| 2. UV-vis spectra of <b>DAD-X</b>                                                                        | S4        |
| 3. ESR spectra and $\tau_R$ values of <b>DAD-X</b>                                                       | S5        |
| 4. IR spectra of <b>DAD-X</b>                                                                            | S6        |
| 5. Stability check of <b>DAD-X</b> in water solution                                                     | S7        |
| 6. Phantom images of <b>DAD-X</b> solutions                                                              | S8        |
| 7. Plots of relaxation rate <i>vs.</i> concentration of <b>DAD-X</b> solutions                           | S9        |
| 8. Time-dependent decay curves of <b>DAD-X</b> in the presence of AsA                                    | S10–S13   |
| 9. Cyclic voltammograms of <b>DAD-X</b> in solutions                                                     | S14       |
| 10. Redox potential of <b>DAD-X</b> in solutions                                                         | S15       |
| 11. Optimized structures and Mulliken charges of the oxygen atom in NO.                                  | S16       |
| 12. Gibbs free energies and $\log P$ values obtained from a DFT calculation                              | S17       |
| 13. Space filling model with the percentage of the buried space of <b>DAD-X</b>                          | S18       |
| 14. Plot of reduction potential as function of various parameters                                        | S19       |
| 15. Copies of $^1\text{H}$ NMR spectrum of <b>(8)</b> – <b>(11)</b>                                      | S20 – S21 |
| 16. Copies of $^1\text{H}$ NMR and $^{13}\text{C}$ NMR spectra of the reduction products of <b>DAD-X</b> | S22 – S28 |
| 17. Cartesian coordinates of <b>DAD-X</b>                                                                | S29 – S35 |

**Scheme S1.** Molecular structures consisted of UBD frameworks carrying stable radicals.

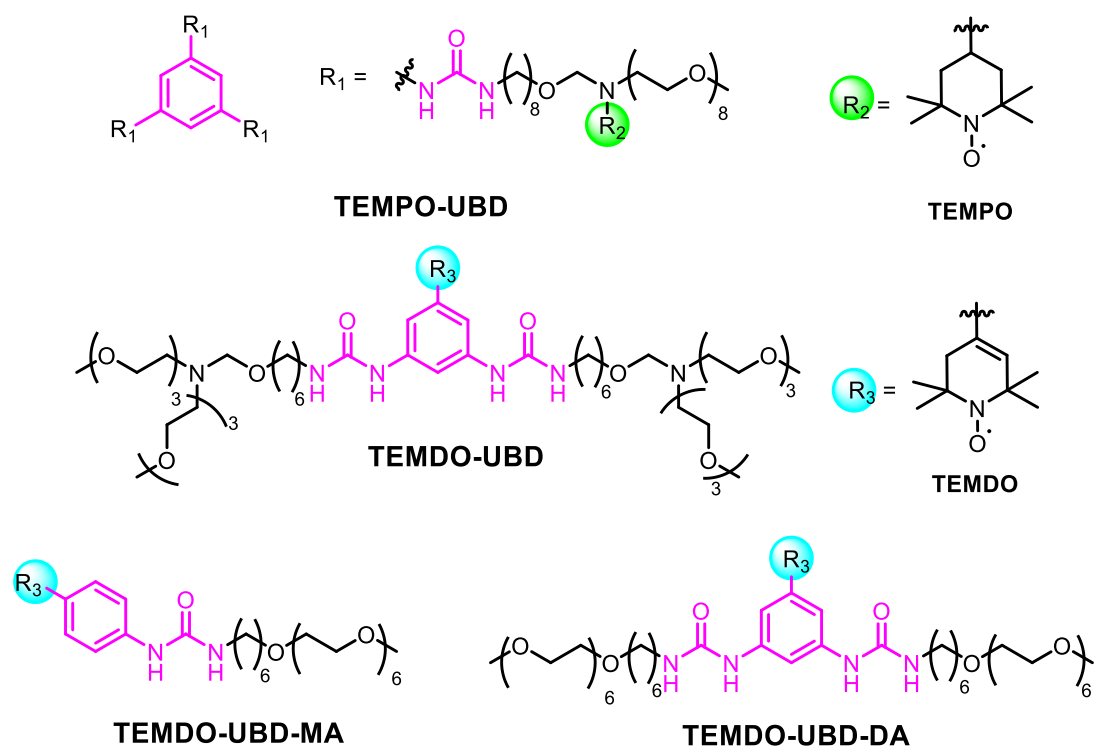

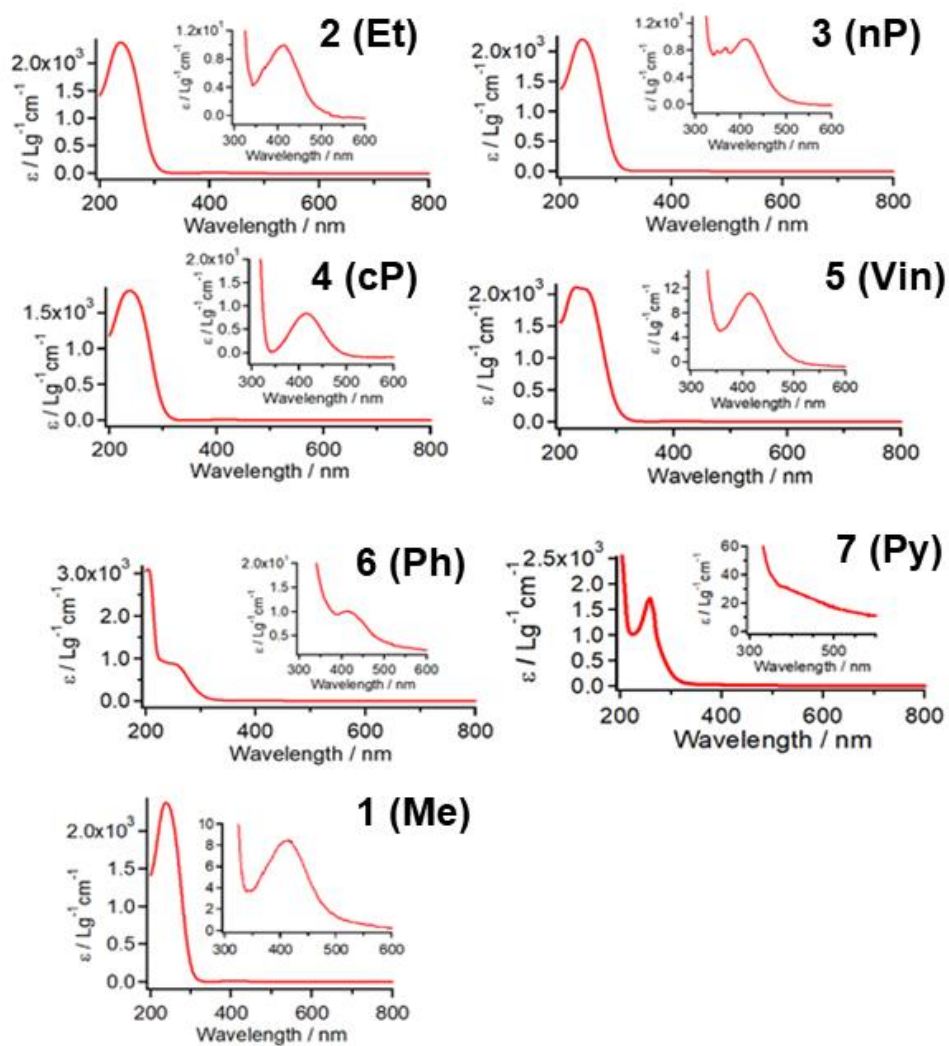

**Figure S1.** UV-vis spectra of the given DAD-X in water.

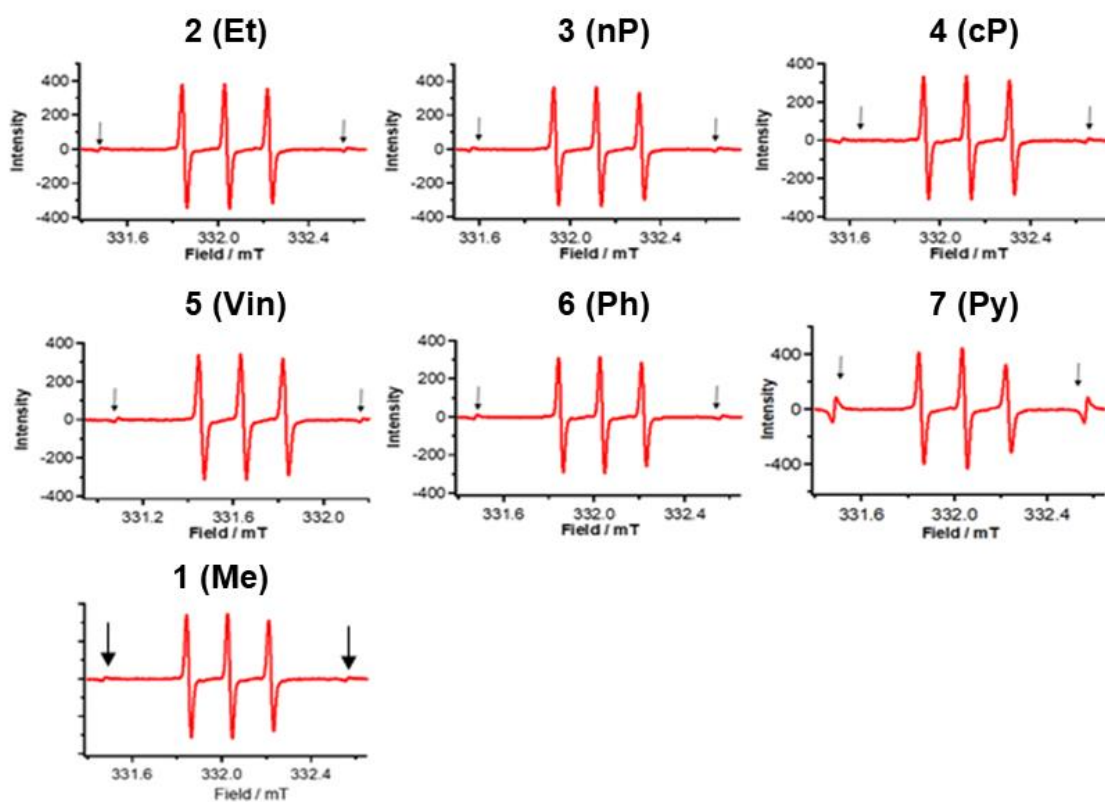

**Figure S2.** ESR spectra of the given **DAD-X** in PBS. The arrows indicate the signals of Mn(II) ions that were used as the standard signals.

**Table S1.** Estimated  $\tau_R$  Values of **DAD-X** in Water Solutions

| <b>DAD-X</b>             | <b>1 (Me)</b> | <b>8 (Py)</b> | <b>5 (Vin)</b> | <b>2 (Et)</b> | <b>4 (cP)</b> | <b>3 (nP)</b> | <b>6 (Ph)</b> |
|--------------------------|---------------|---------------|----------------|---------------|---------------|---------------|---------------|
| $\tau_R$ ( $10^{-11}$ s) | 7.6           | 7.9           | 5.5            | 3.5           | 4.6           | 6.4           | 6.3           |

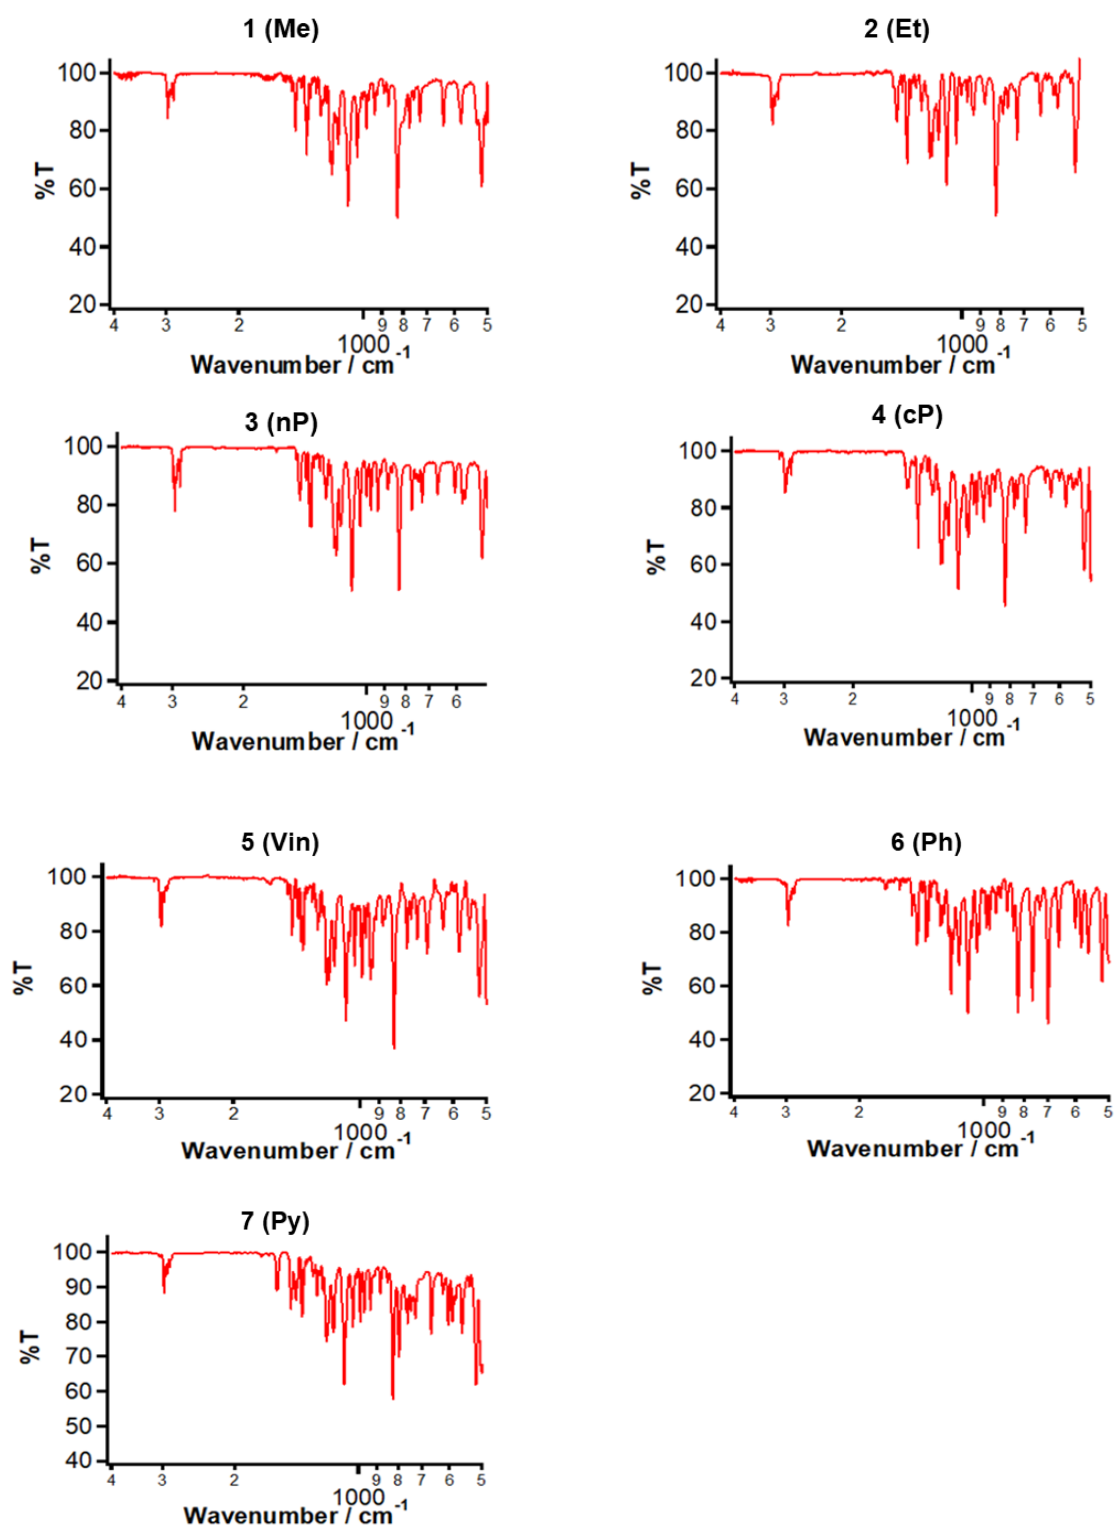

**Figure S3.** IR spectra of the given **DAD-X** with the use of a NaCl block.

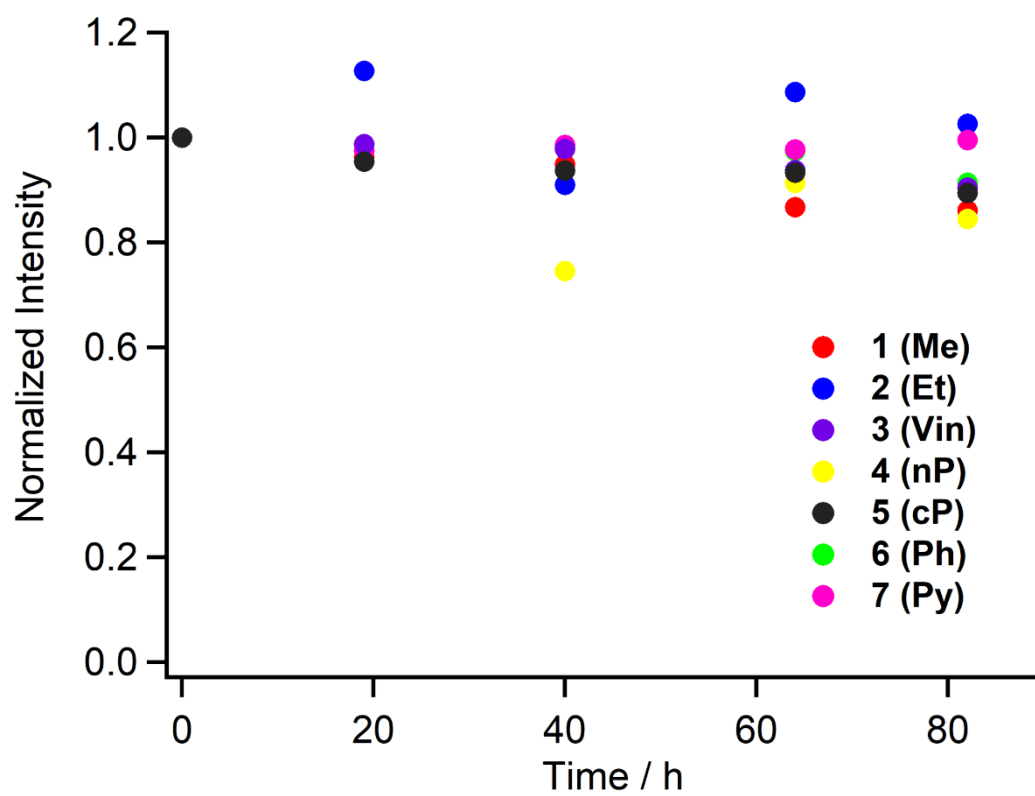

**Figure S4.** Stability check of **DAD-X** by change of ESR signal. The double integration of ESR signals for the corresponding 1 mM water solutions of **DAD-X** were monitored at 23 °C until 82 h.

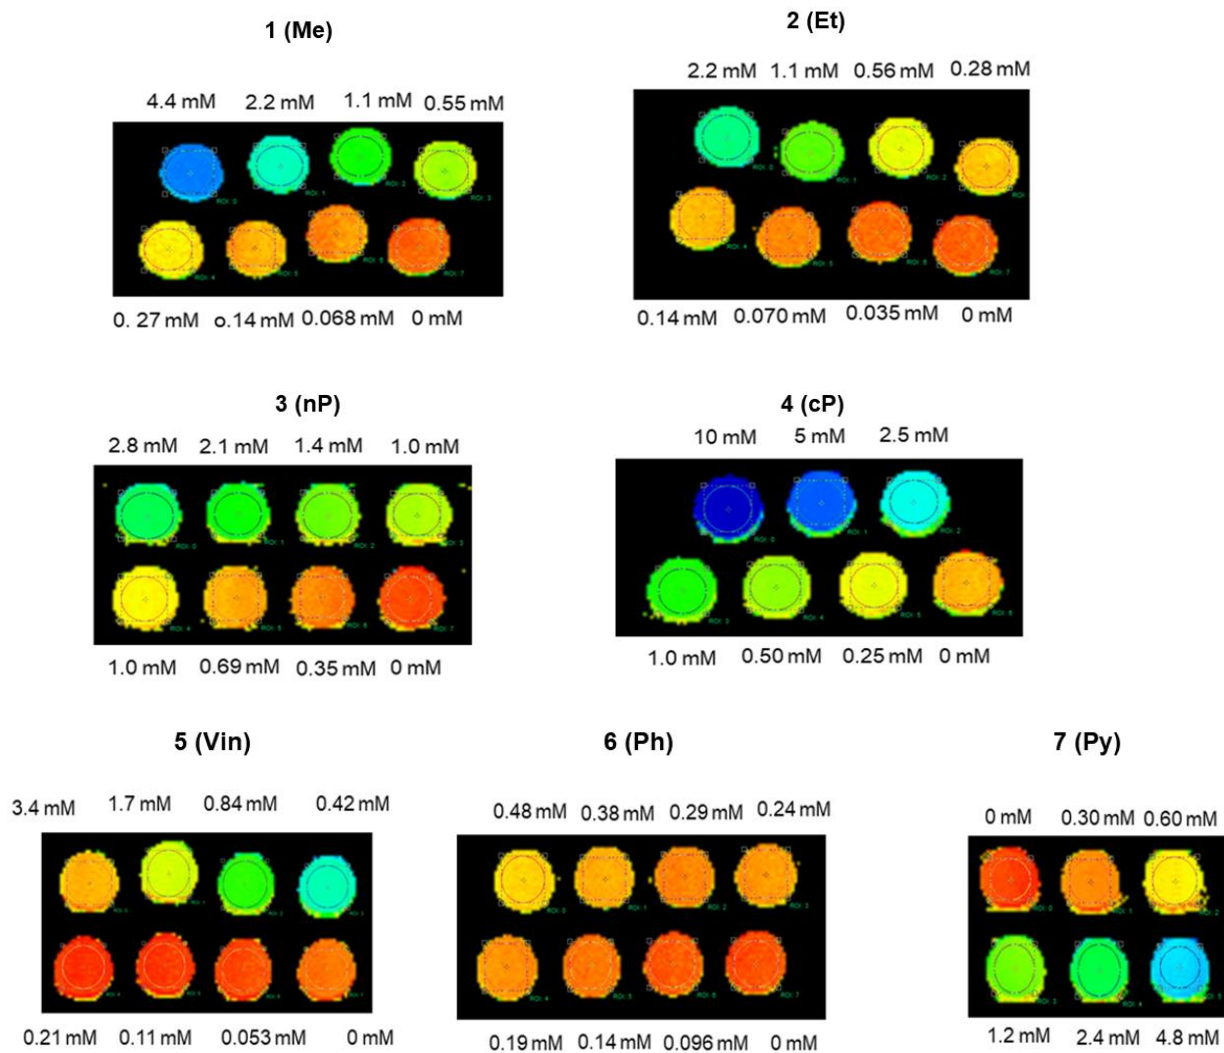

**Figure S5-1.** Estimated  $T_1$ -weighted images (phantom images) of the **DAD-X** solutions in PBS. The solution concentrations are listed in these images.



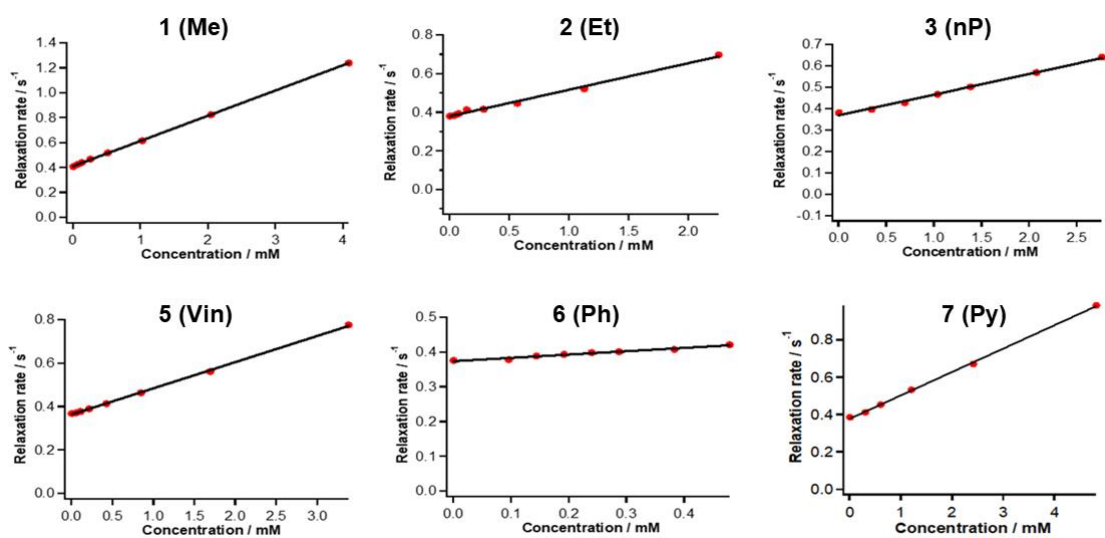

**Figure S5-2.** Plots of relaxation time vs. concentration for the given DAD-X in PBS.

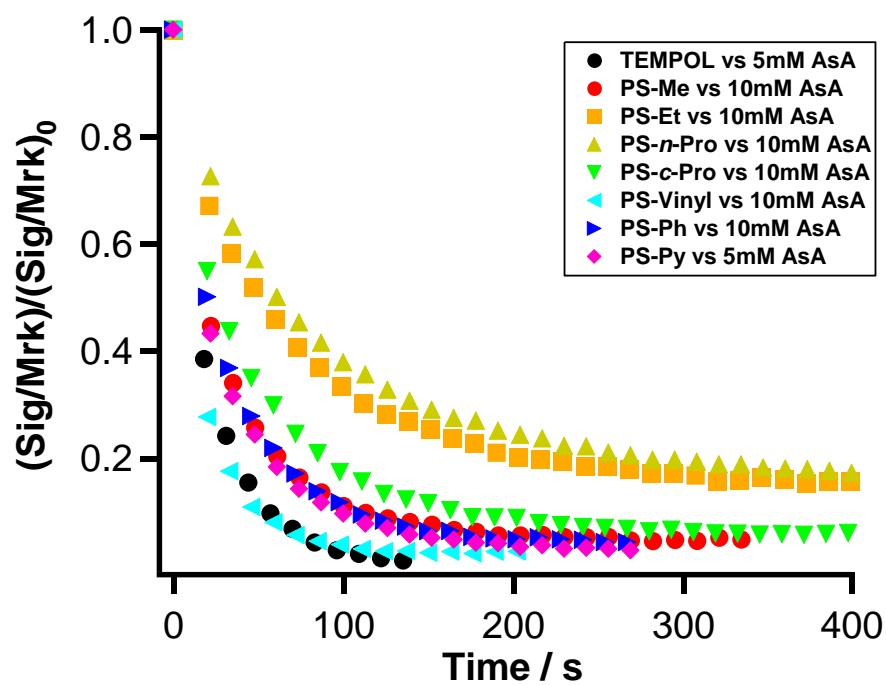

**Figure S6.** Time-dependent decay curves obtained from the ESR intensities of **DAD-X** (50 μM) for various concentrations of ascorbic acid.

(a)

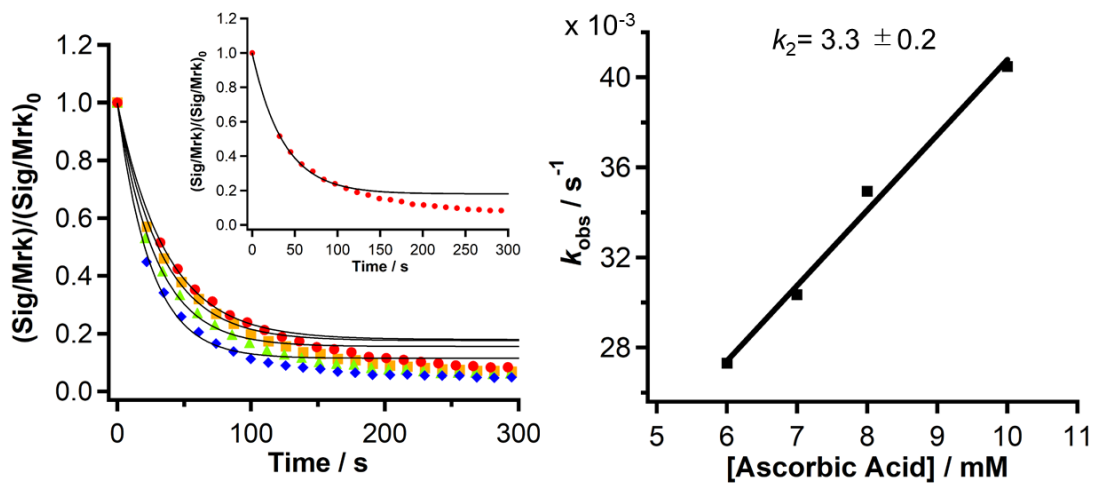

(b)

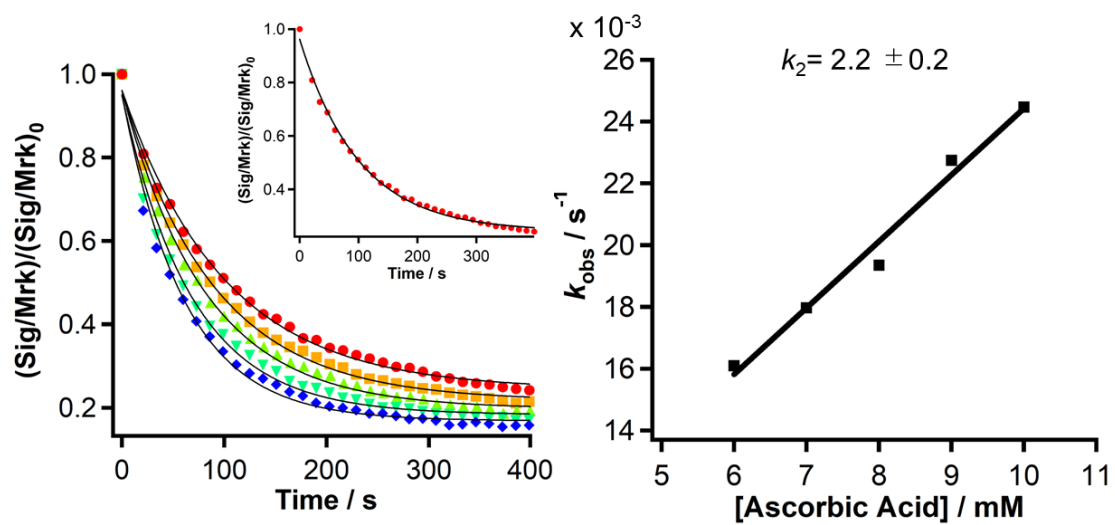

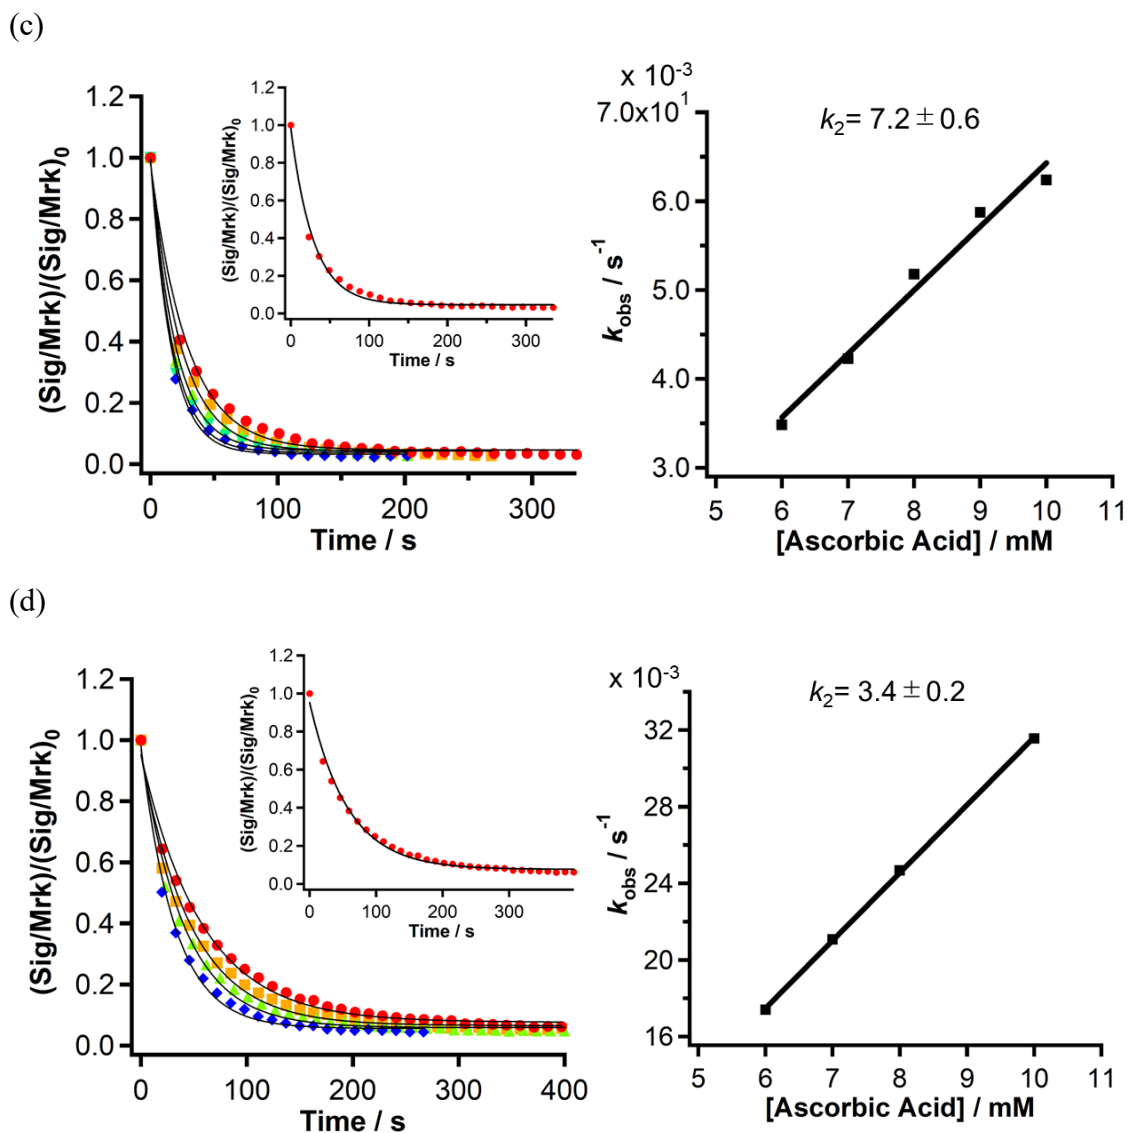

**Figure S7.** (Left) Time-dependent decay curves obtained from the ESR intensities of (a) **1 (Me)**, (b) **2 (Et)**, (c) **5 (Vin)**, and (d) **6 (Ph)** at various concentrations of the ascorbic acid (AsA). Solid lines indicate the curve fitting according to equation 2. Red, orange, green, sky blue, and blue colored circles represent 6, 7, 8, 9, and 10 mM of AsA. Inset show the result of 6 mM. (Right) Plots of the resulting  $k_{\text{obs}}$  values vs. concentration of AsA.

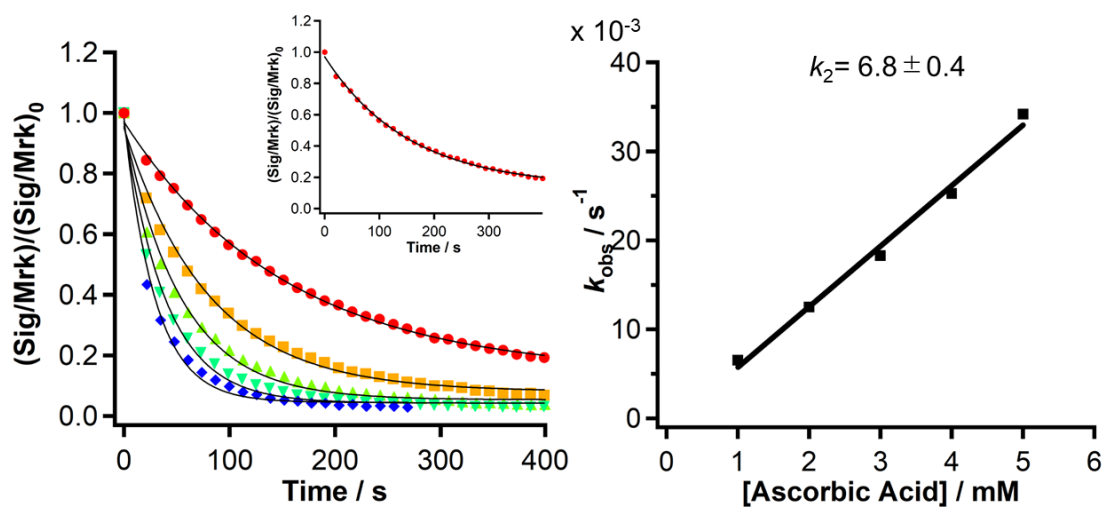

**Figure S8.** (Left) Time-dependent decay curves obtained from the ESR intensities of **8** (**Py**) at various concentrations of ascorbic acid (AsA). Solid lines indicate the curve fitting according to equation 2. Red, orange, green, sky blue, and blue colored circles represent 1, 2, 3, 4, and 5 mM of AsA. Inset show the result of 6 mM. (Right) Plots of the resulting  $k_{\text{obs}}$  values vs. concentration of AsA.

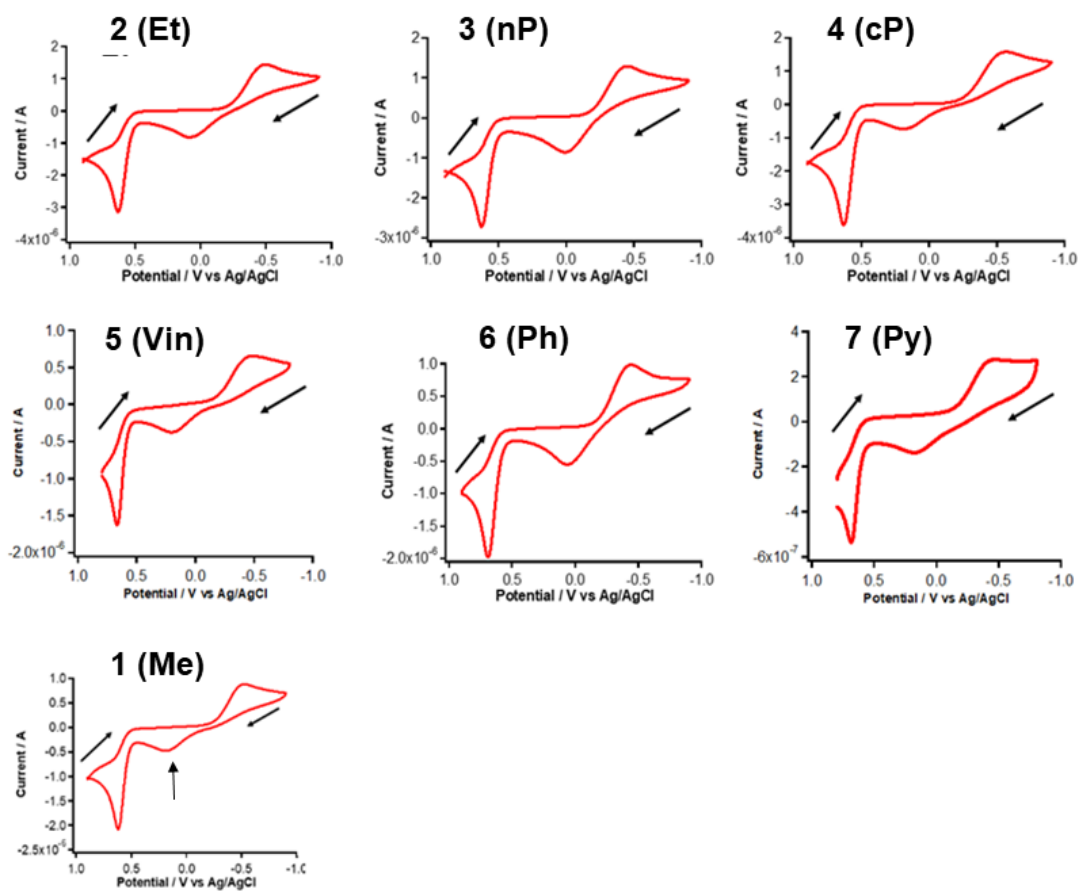

**Figure S9.** Cyclic voltammograms of the DAD-X solutions in PBS.

**Table S2.** Estimated Redox Potentials of **DAD-X**.<sup>†</sup>

| <b>DAD-X</b>        | <b>1 (Me)</b>                                             | <b>7 (Py)</b>                               | <b>5 (Vin)</b>                              | <b>2 (Et)</b>                               | <b>4 (cP)</b>                               | <b>5 (nP)</b>                             | <b>6 (Ph)</b>                                  |
|---------------------|-----------------------------------------------------------|---------------------------------------------|---------------------------------------------|---------------------------------------------|---------------------------------------------|-------------------------------------------|------------------------------------------------|
|                     | Oxidation (OP) and reduction (RP) potentials <sup>*</sup> |                                             |                                             |                                             |                                             |                                           |                                                |
| OP <sup>††</sup>    | 0.83 <sup>**</sup> ,<br>0.77 <sup>#</sup>                 | 0.90 <sup>**</sup> ,<br>0.83 <sup>#</sup>   | 0.86 <sup>**</sup> ,<br>0.80 <sup>#</sup>   | 0.83 <sup>**</sup> ,<br>0.78 <sup>#</sup>   | 0.82 <sup>**</sup> ,<br>0.78 <sup>#</sup>   | 0.83 <sup>**</sup> ,<br>0.76 <sup>#</sup> | 0.92 <sup>**</sup> ,<br>0.84 <sup>#</sup>      |
| RP <sup>††</sup>    | -0.16 <sup>**</sup> ,<br>-0.23 <sup>#</sup>               | -0.11 <sup>**</sup> ,<br>-0.14 <sup>#</sup> | -0.13 <sup>**</sup> ,<br>-0.14 <sup>#</sup> | -0.10 <sup>**</sup> ,<br>-0.15 <sup>#</sup> | -0.11 <sup>**</sup> ,<br>-0.15 <sup>#</sup> | -0.075 <sup>#</sup>                       | 0.0030 <sup>**</sup> ,<br>-0.0030 <sup>#</sup> |
| logP <sup>###</sup> | 1.87                                                      | 2.19                                        | 2.46                                        | 2.50                                        | 2.53                                        | 3.09                                      | 3.17                                           |

<sup>†</sup>**DAD-X** is aligned in the order of log*P*. <sup>††</sup>OP: oxidation potential, RP: reduction potential. <sup>\*</sup>Glassy carbon electrode, Ag/AgCl, Pt, sweep rate 4 mV·s<sup>-1</sup>, all potentials shown are versus SHE. <sup>\*\*</sup>Obtained by SHACV. <sup>#</sup>Obtained by DPV. <sup>###</sup>UB3LYP-D3(BJ)/6-311G<sup>\*\*</sup>//UB3LYP-D3(BJ)/6-31G<sup>\*</sup>.

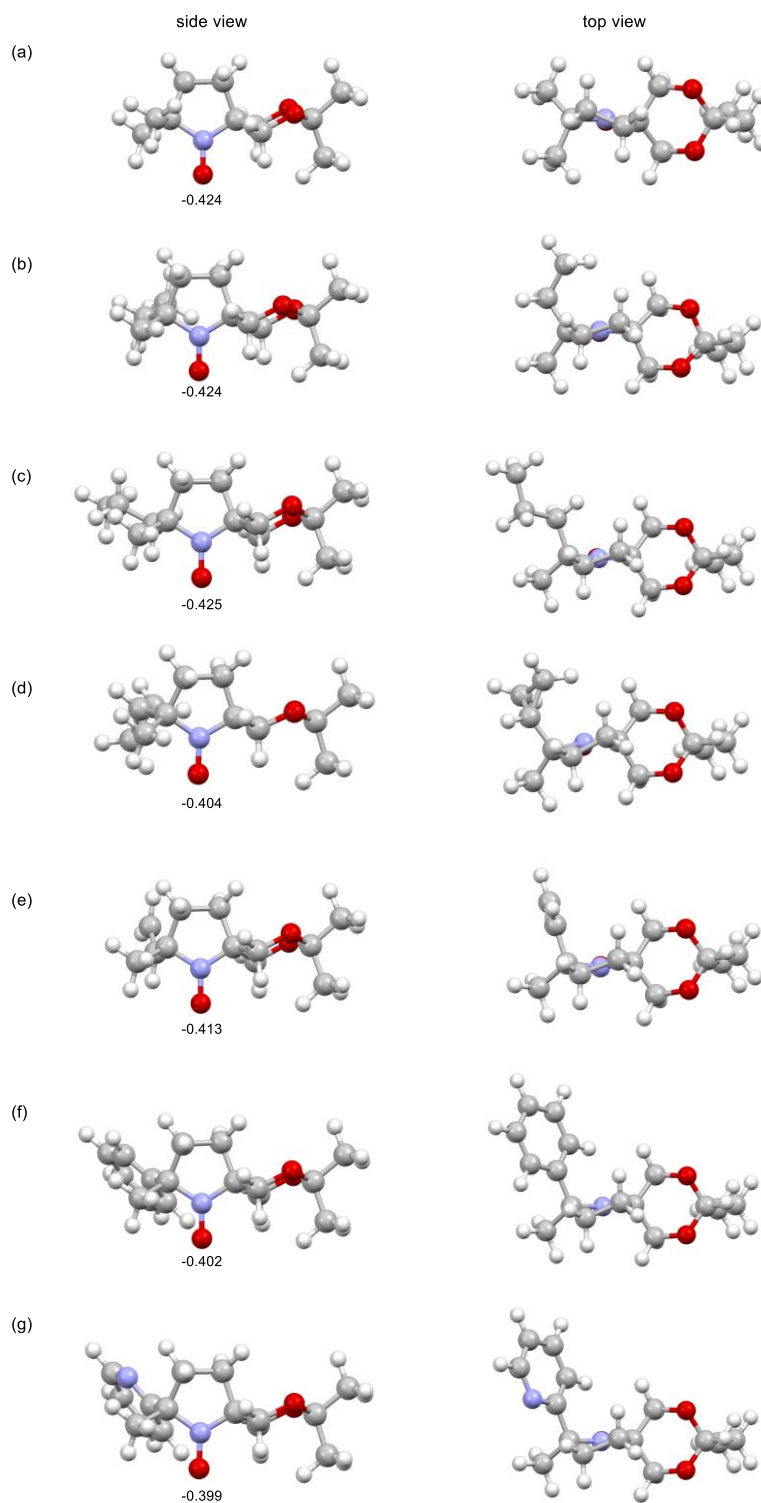

**Figure S10.** Optimized structures and Mulliken charges of the oxygen atom in NO for (a) **1 (Me)**, (b) **2 (Et)**, (c) **3 (nP)**, (d) **4 (cP)**, (e) **5 (Vin)**, (f) **6 (Ph)**, and (g) **7 (Py)**. The gray, blue, red, and white atoms denote C, N, O, H atoms, respectively.



**Table S3.** Solvation Gibbs Free Energies ( $-\Delta G_{\text{sol}}$ , J) and  $\log P$  Values in *n*-Octanol and Water Solvents Based on DFT Calculations.

| Radical        | $-\Delta G_{\text{sol (n-octanol)}} \text{ (J)}$ | $-\Delta G_{\text{sol (water)}} \text{ (J)}$ | $\log P$ |
|----------------|--------------------------------------------------|----------------------------------------------|----------|
| <b>1 (Me)</b>  | -43843.22                                        | -33170.57                                    | 1.87     |
| <b>2 (Et)</b>  | -46980.70                                        | -32734.73                                    | 2.50     |
| <b>3 (nP)</b>  | -48983.95                                        | -31319.59                                    | 3.09     |
| <b>4 (cP)</b>  | -47434.91                                        | -32981.53                                    | 2.53     |
| <b>5 (Vin)</b> | -44113.65                                        | -30043.60                                    | 2.46     |
| <b>6 (Ph)</b>  | -53922.52                                        | -35801.32                                    | 3.17     |
| <b>7 (Py)</b>  | -51522.81                                        | -39041.18                                    | 2.19     |

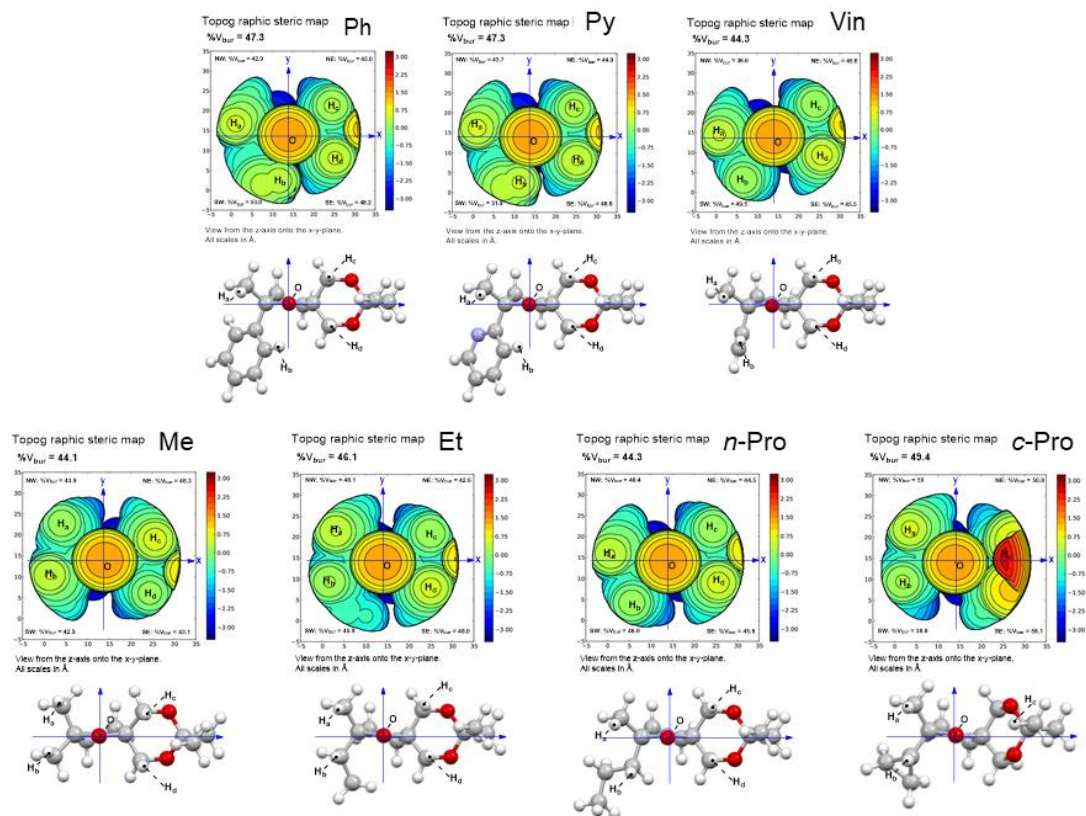

**Figure S11.** Space filling models of DAD-X. Phrase of  $\%V_{bur}$  indicates the percentage of the buried volume.

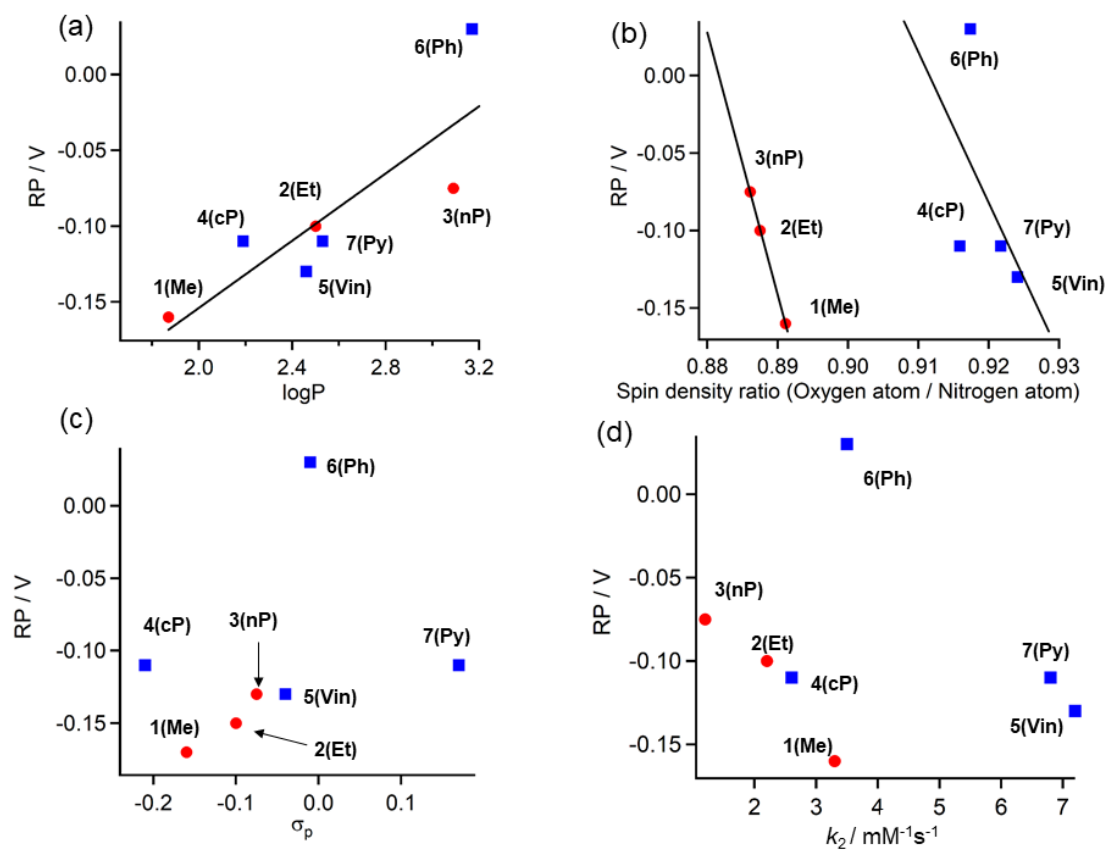

**Figure S12.** Correlations between RP and various parameters. (a) *reduction potential vs logP*. (b) *reduction potential vs SDR*. (c) *reduction potential vs  $\sigma_p$* . (d) *reduction potential vs  $k_2$* . The solid lines indicate least-squares fitting lines.

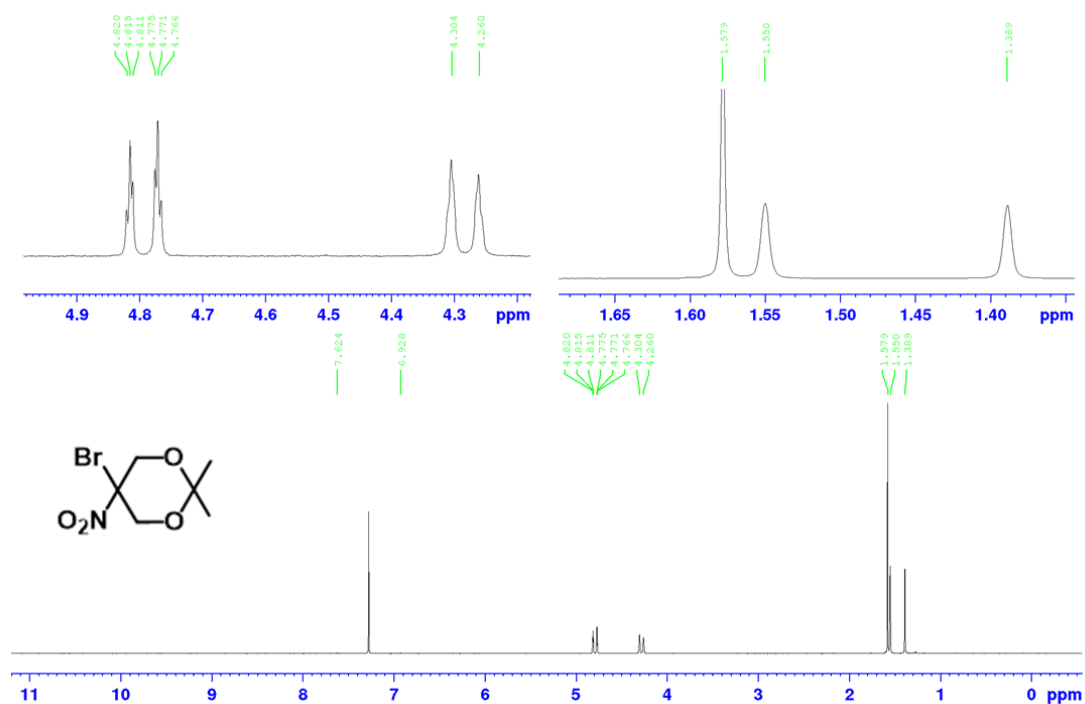

Figure S13. <sup>1</sup>H NMR spectrum of (1) in CDCl<sub>3</sub>.

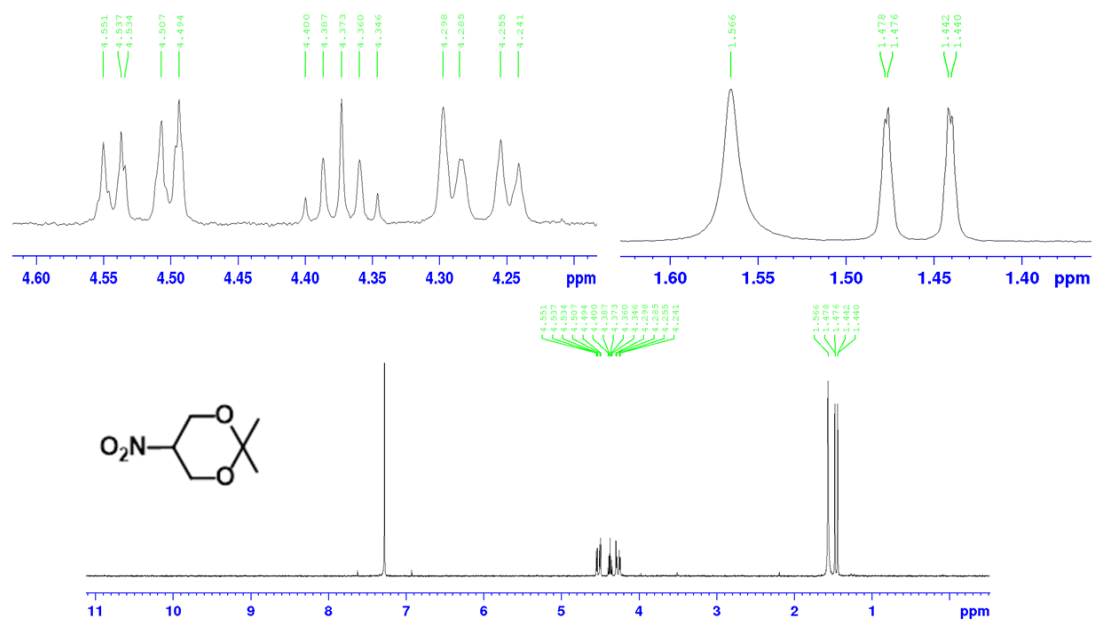

Figure S14. <sup>1</sup>H NMR spectrum of (2) in CDCl<sub>3</sub>.

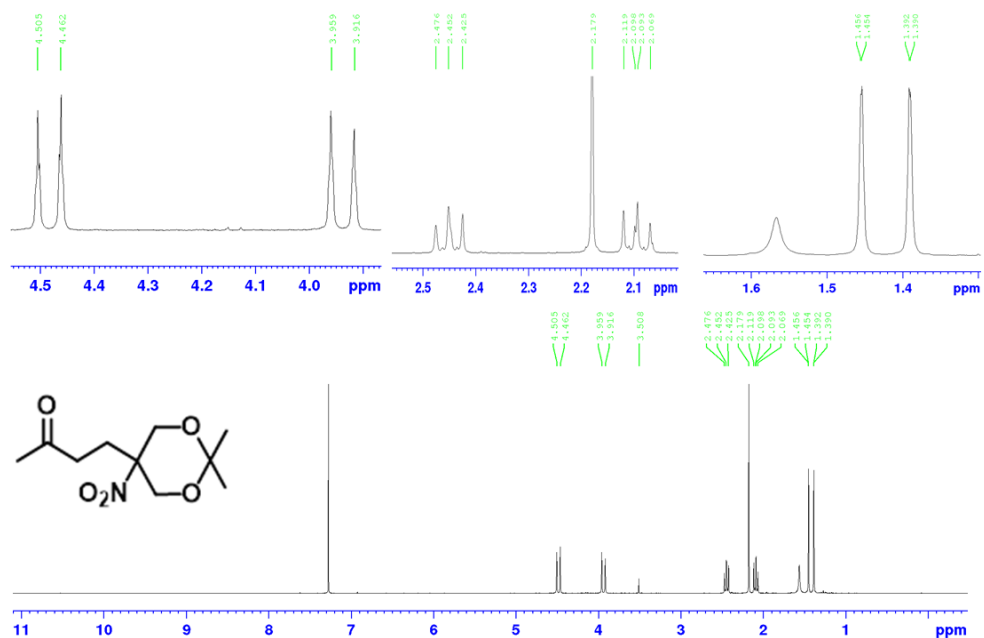

**Figure S15.**  $^1\text{H}$  NMR spectrum of (3) in  $\text{CDCl}_3$ .

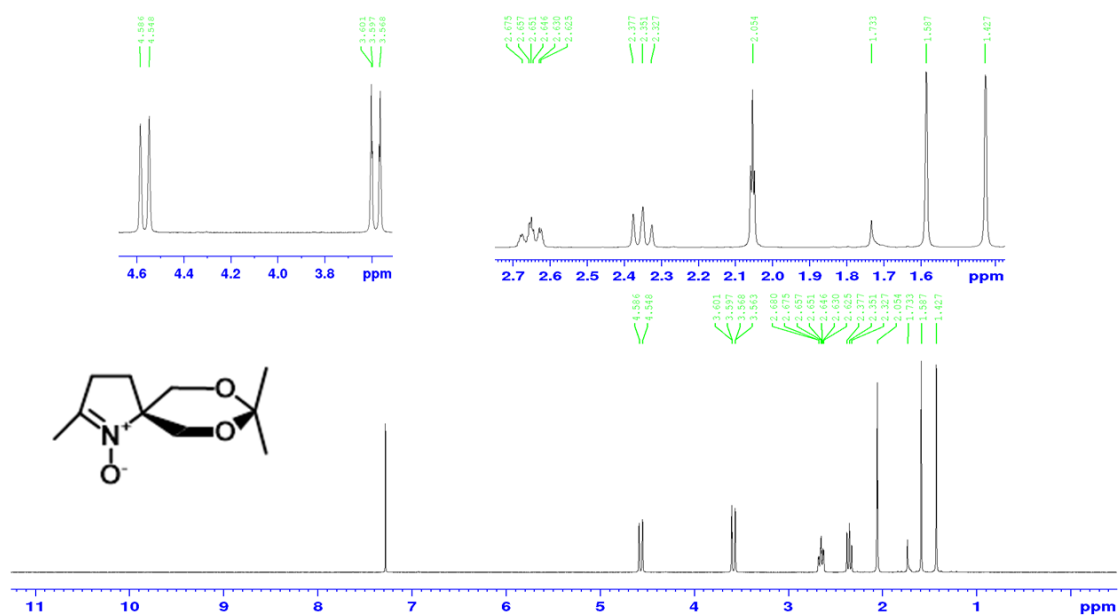

**Figure S16.**  $^1\text{H}$  NMR spectrum of (4) in  $\text{CDCl}_3$ .

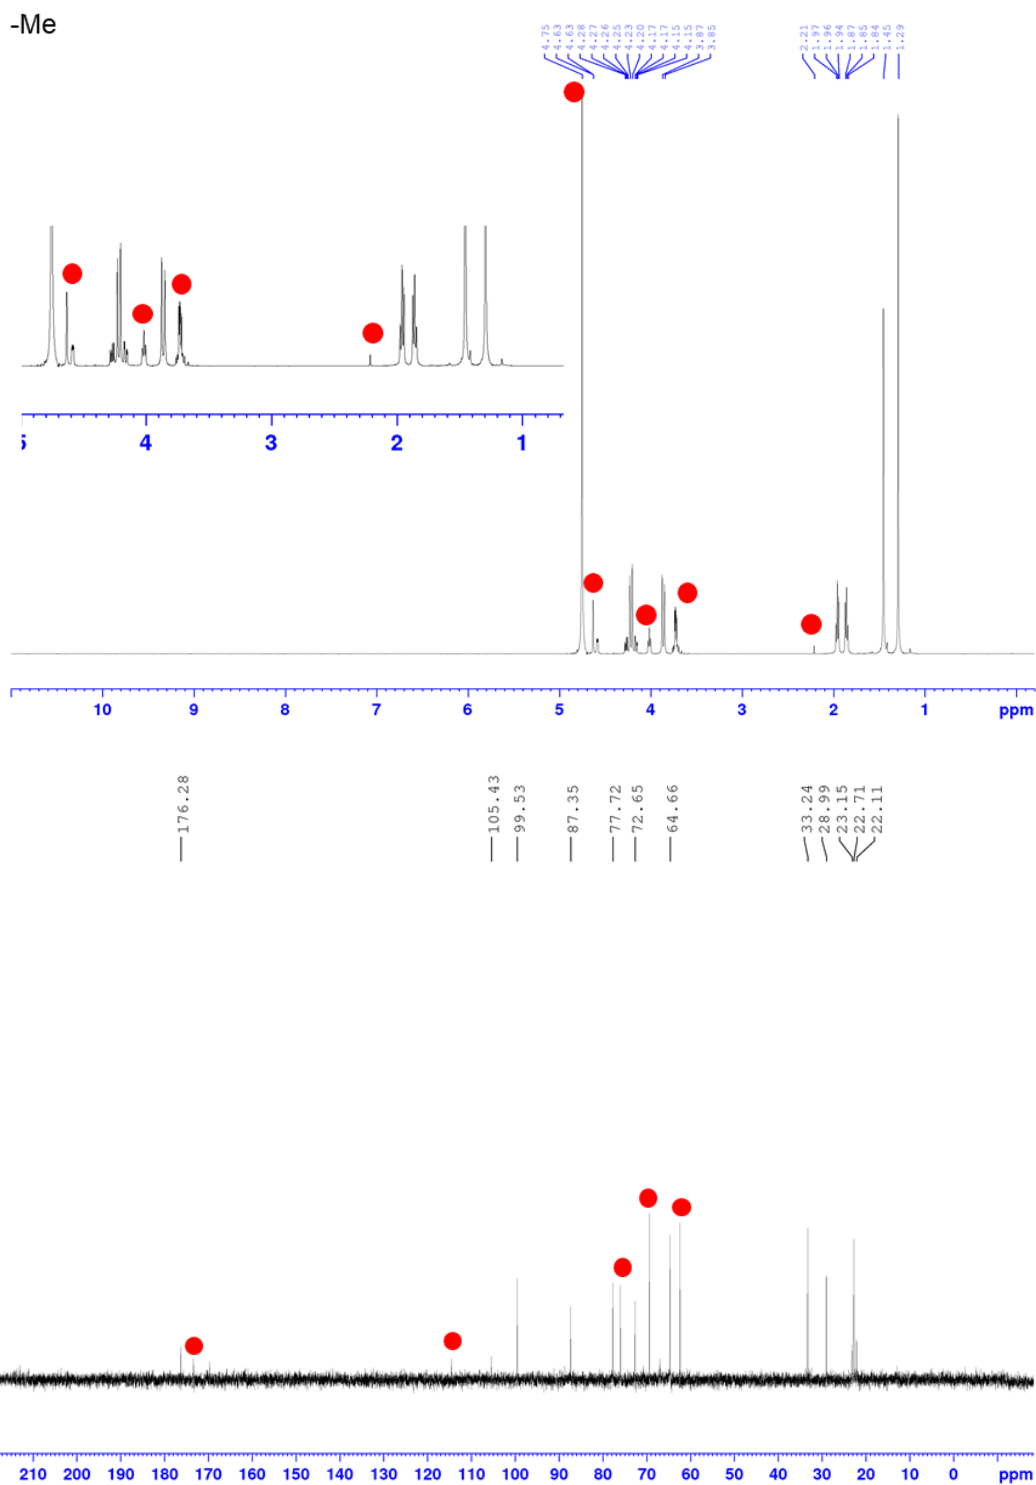

**Figure S17.**  $^1\text{H}$  (upper) and  $^{13}\text{C}$  (lower) NMR spectra of the hydroxylamine derivative derived from a reduction reaction of **1(Me)** by ascorbic acid (AsA) in  $\text{D}_2\text{O}$ . Reddish filled circles indicate the peaks of AsA and/or that oxidation product, and  $\text{H}_2\text{O}$ .

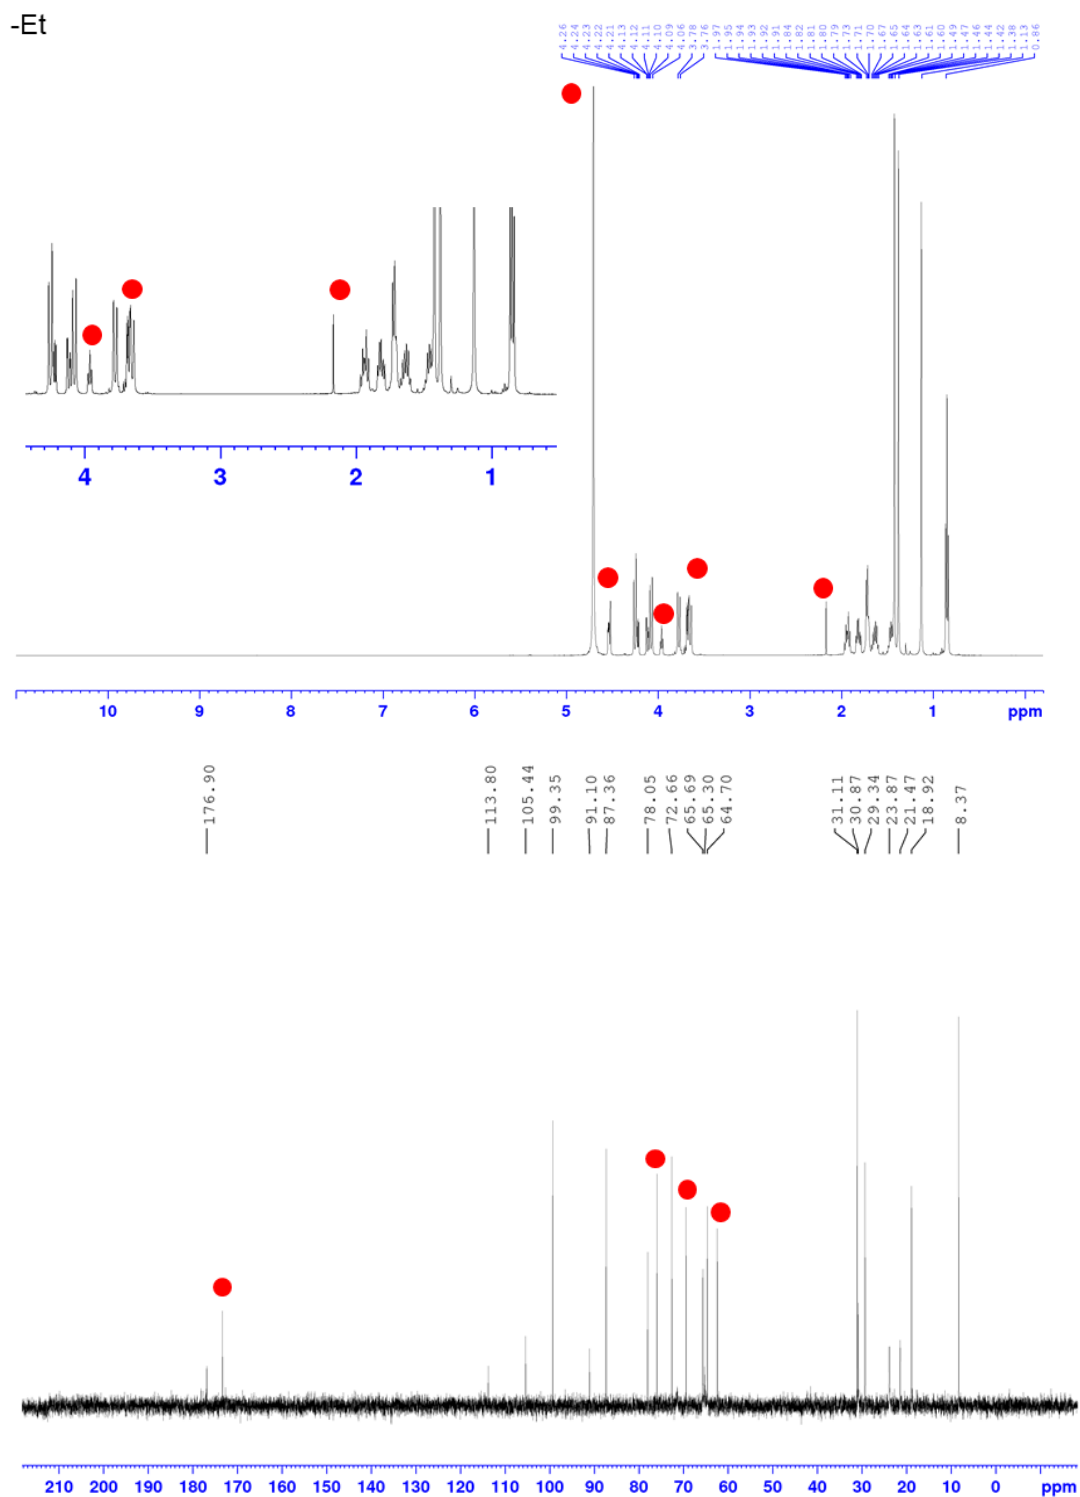

**Figure S18.**  $^1\text{H}$  (upper) and  $^{13}\text{C}$  (lower) NMR of the hydroxylamine derivative derived from a reduction reaction of **2(Et)** by ascorbic acid (AsA) in  $\text{D}_2\text{O}$ . Reddish filled circles indicate the peaks of AsA and/or that oxidation product, and  $\text{H}_2\text{O}$ .

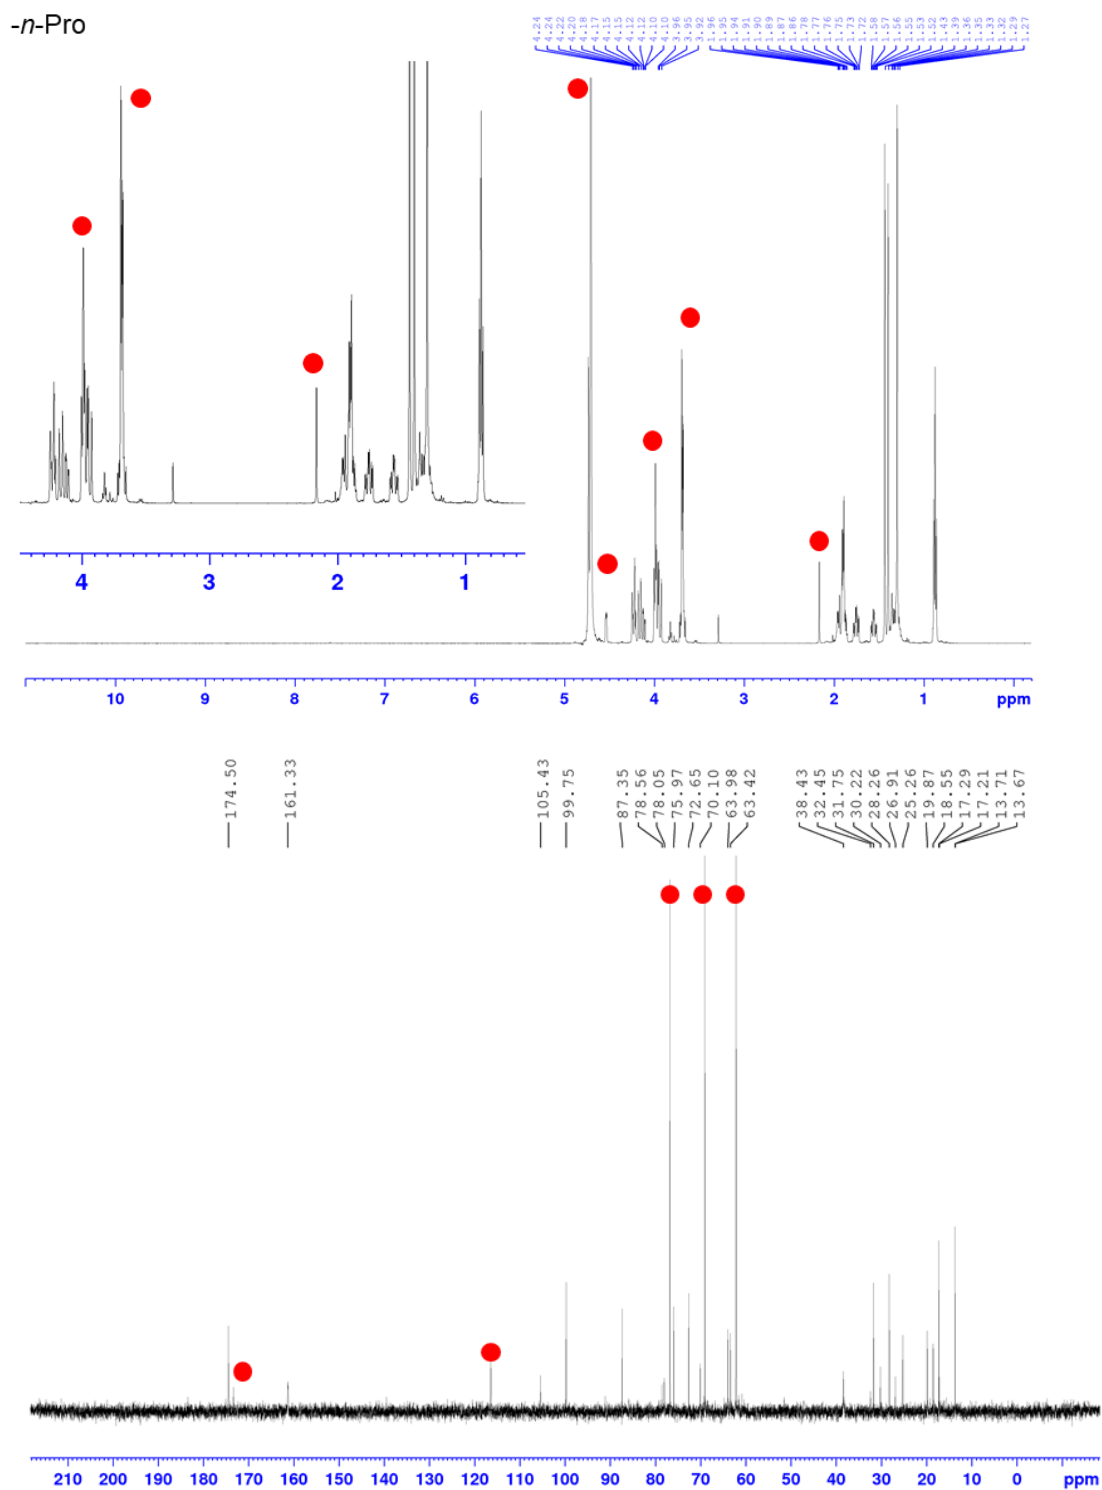

**Figure S19.**  $^1\text{H}$  (upper) and  $^{13}\text{C}$  (lower) NMR of the hydroxylamine derivative derived from a reduction reaction of **3(nP)** by ascorbic acid (AsA) in  $\text{D}_2\text{O}$ . Reddish filled circles indicate the peaks of AsA and/or that oxidation product, and  $\text{H}_2\text{O}$ .



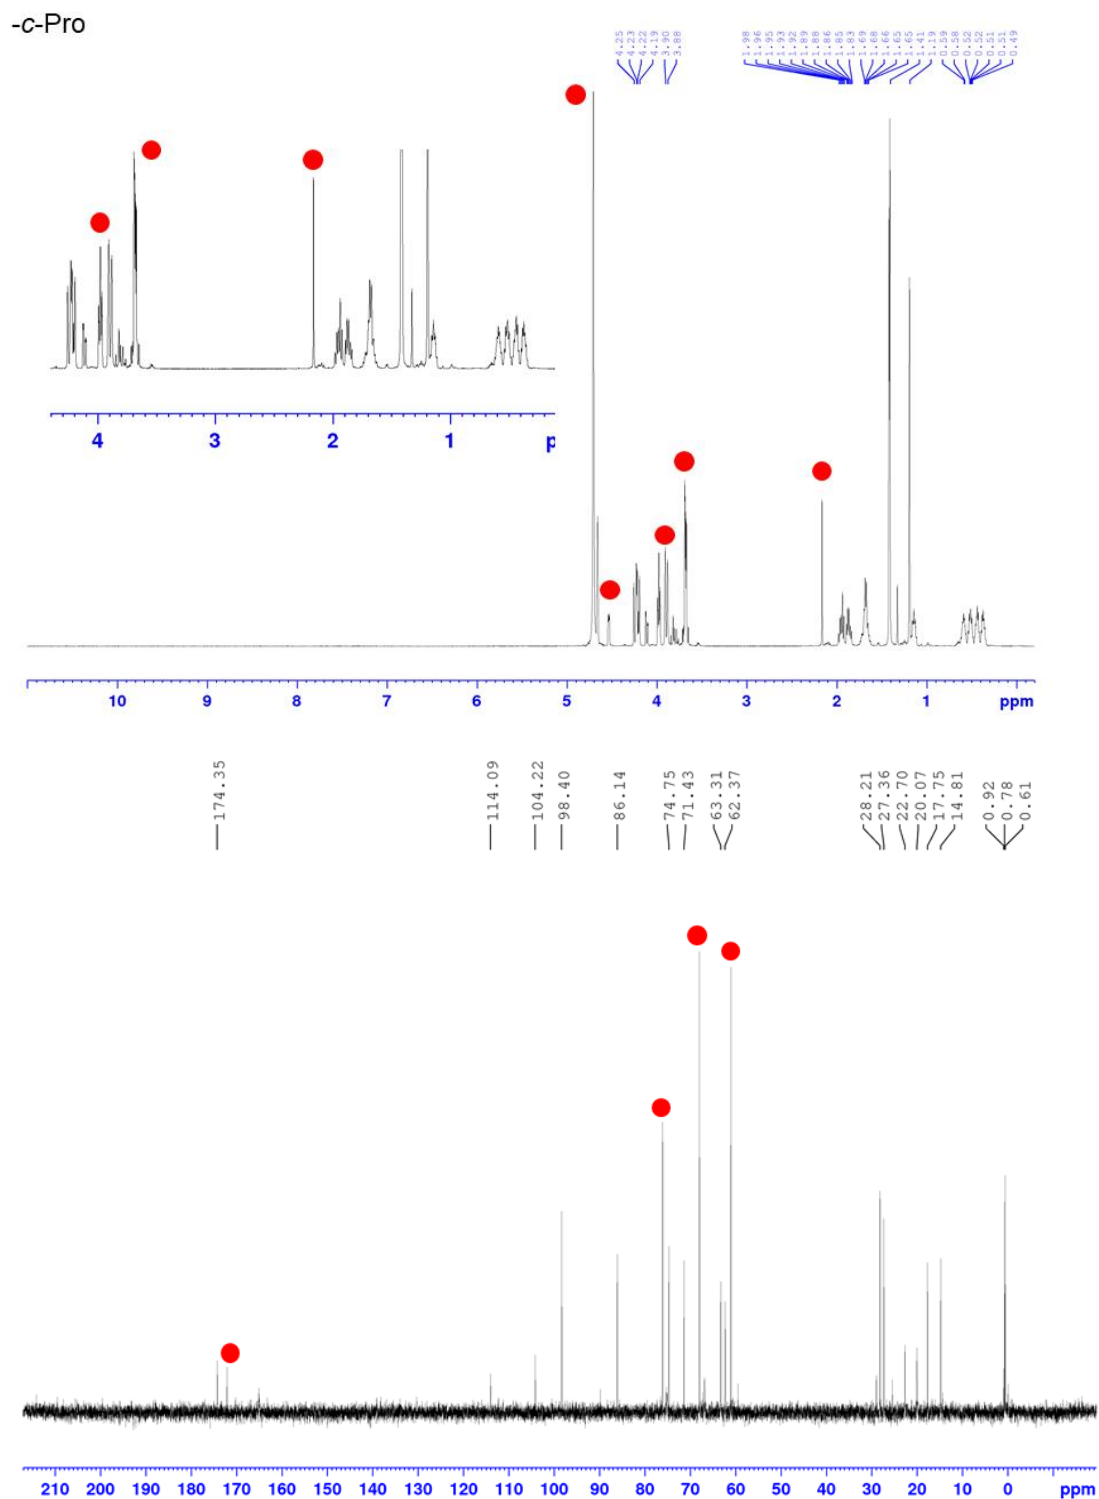

**Figure S20.**  $^1\text{H}$  (upper) and  $^{13}\text{C}$  (lower) NMR of the hydroxylamine derivative derived from a reduction reaction of **4(cP)** by ascorbic acid (AsA) in  $\text{D}_2\text{O}$ . Reddish filled circles indicate the peaks of AsA and/or that oxidation product, and  $\text{H}_2\text{O}$ .

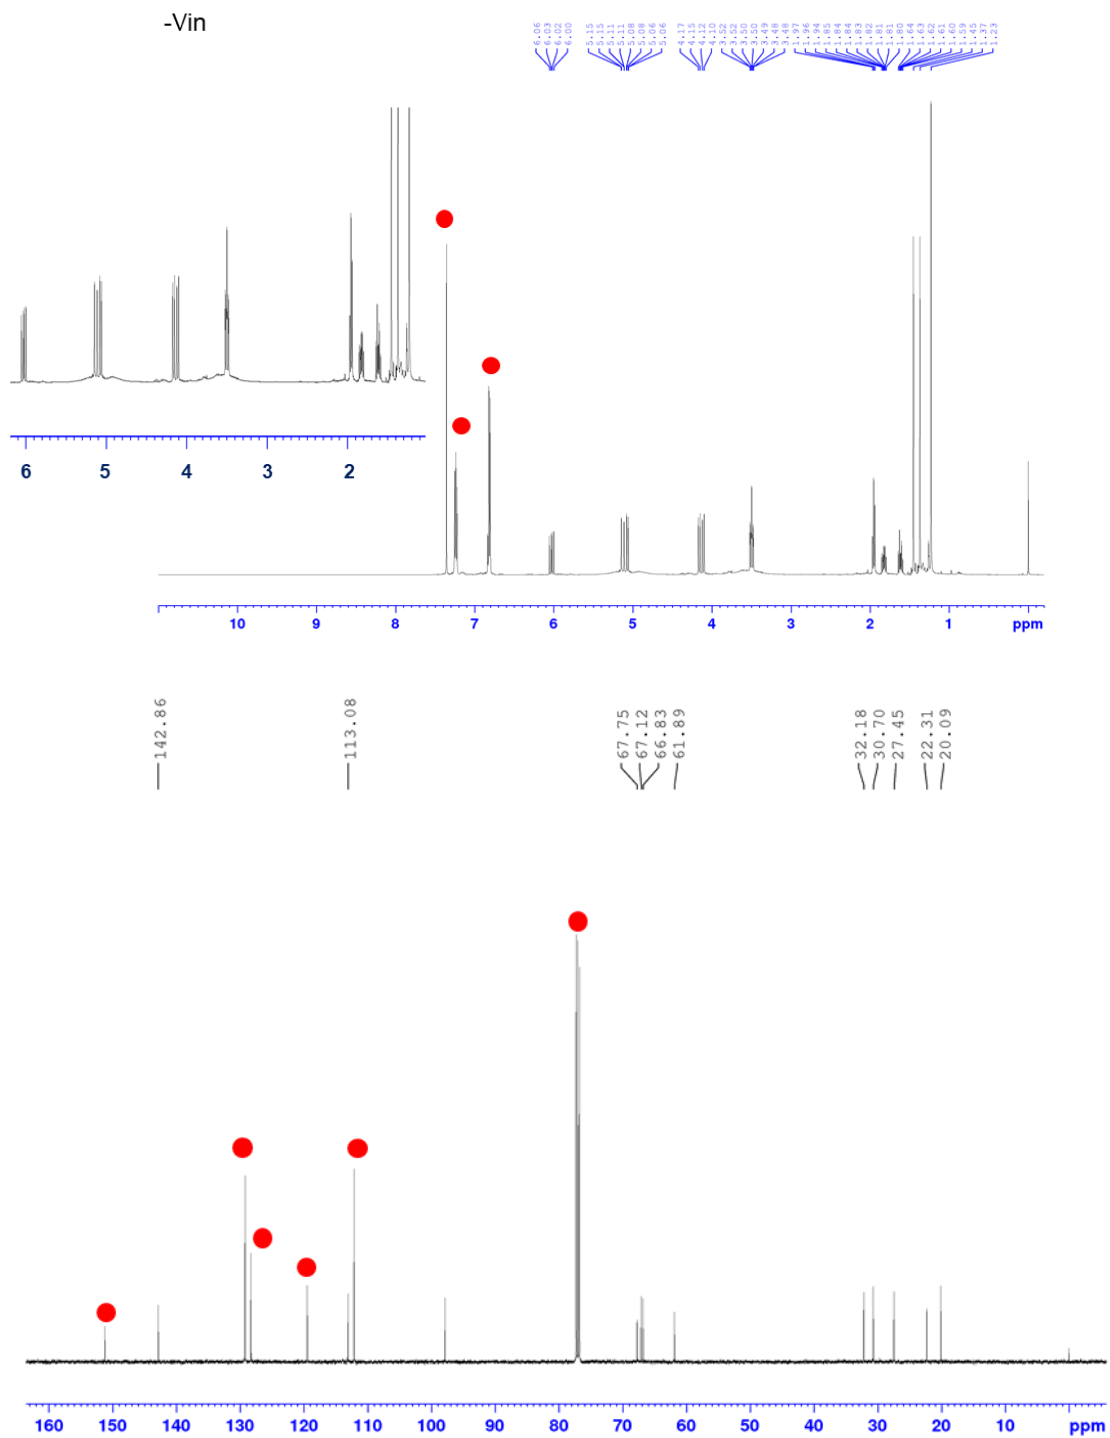

**Figure S21.**  $^1\text{H}$  (upper) and  $^{13}\text{C}$  (lower) NMR of the hydroxylamine derivative derived from a reduction reaction of **5(Vin)** by phenylhydrazine (PH) in  $\text{CDCl}_3$ . Reddish filled circles indicate the peaks of PH and/or that oxidation product, and  $\text{CHCl}_3$ .

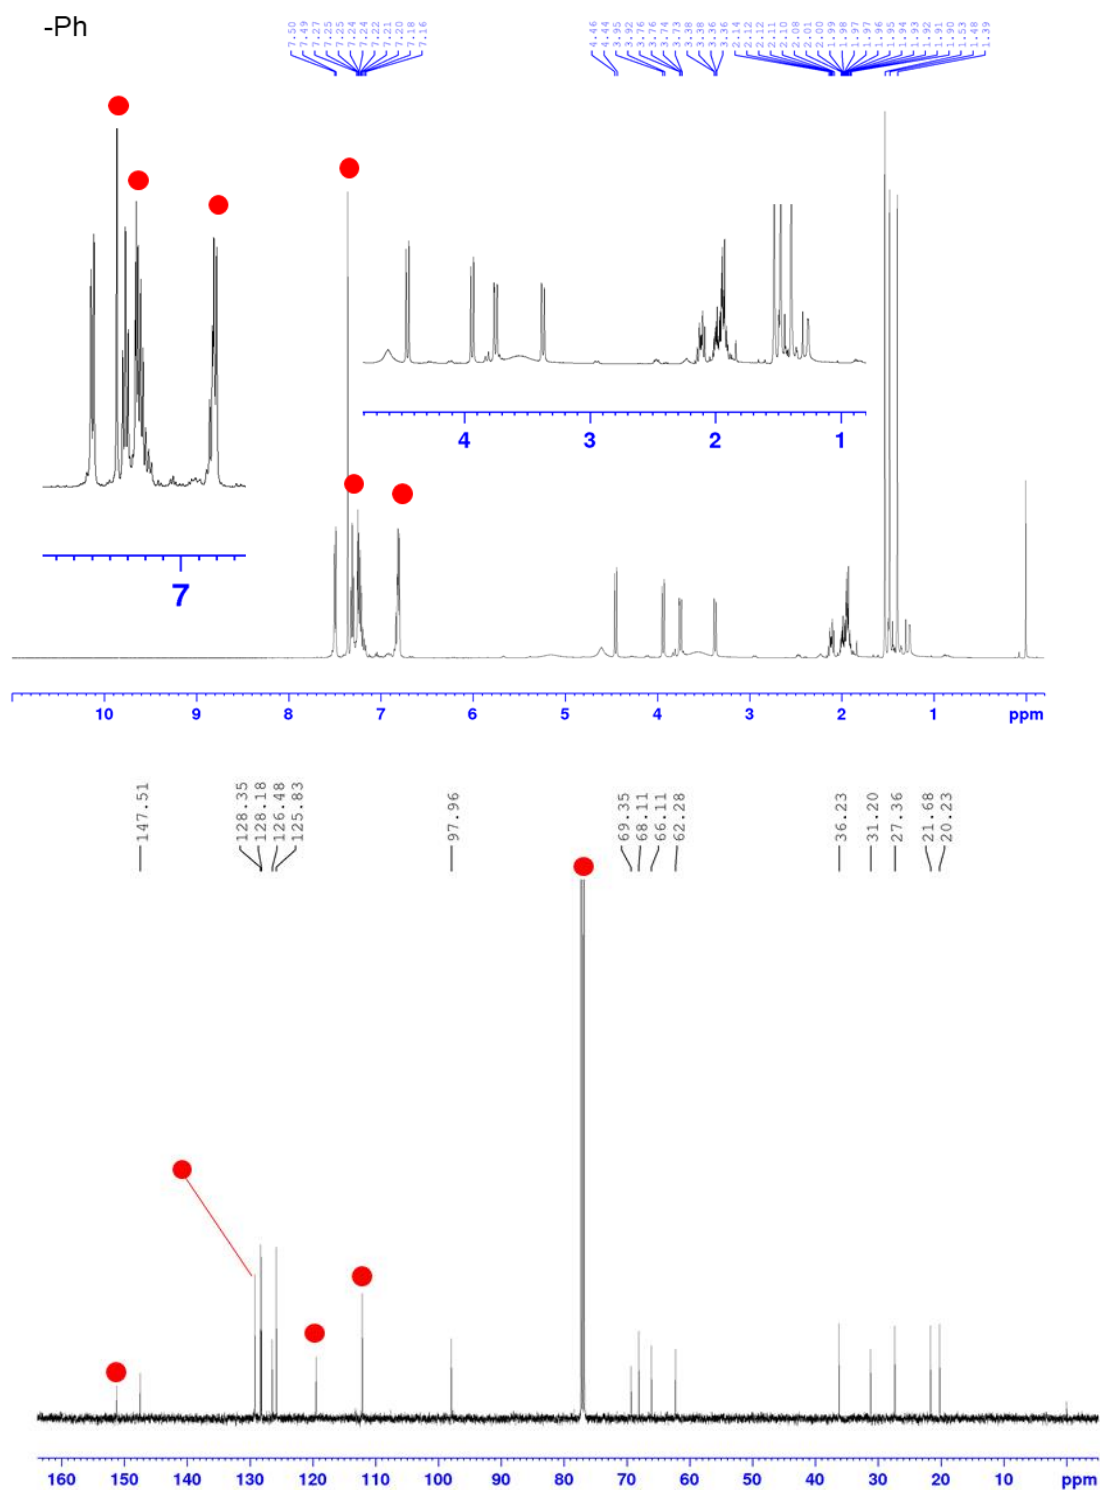

**Figure S22.** <sup>1</sup>H (upper) and <sup>13</sup>C (lower) NMR of the hydroxylamine derivative derived from a reduction reaction of **6(Ph)** by phenylhydrazine (PH) in CDCl<sub>3</sub>. Reddish filled circles indicate the peaks of PH and/or that oxidation product, and CHCl<sub>3</sub>

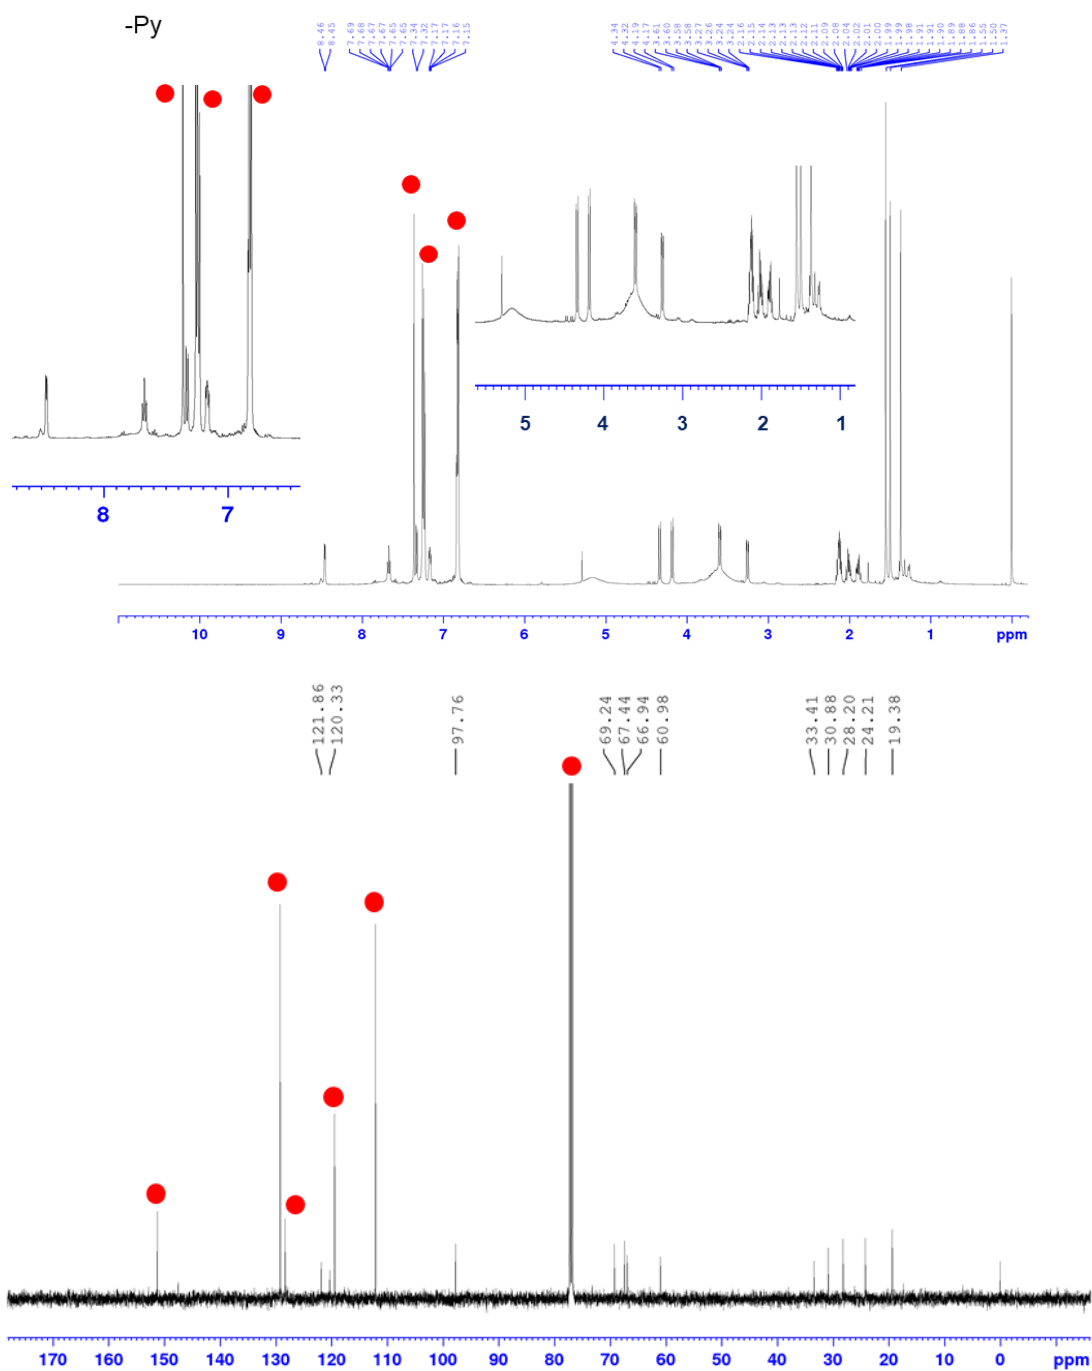

**Figure S23.** <sup>1</sup>H (upper) and <sup>13</sup>C (lower) NMR of the hydroxylamine derivative derived from a reduction reaction of **7(Py)** by phenylhydrazine (PH) in CDCl<sub>3</sub>. Reddish filled circles indicate the peaks of PH and/or that oxidation product, and CHCl<sub>3</sub>.

## Cartesian coordinates

### Me in water (the most stable conformer)

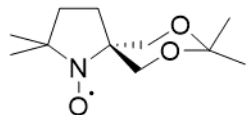

B3LYP-D3(BJ)/6-311G\*\*/smd=water//B3LYP-D3(BJ)/6-31G\*/smd=water

Electronic Energy (EE) = -711.840084 a.u.

EE + Thermal Free Energy Correction = -711.576293 a.u.

### Cartesian coordinates

| Symbol | X         | Y         | Z         |
|--------|-----------|-----------|-----------|
| H      | -0.059854 | -2.216195 | -0.296878 |
| C      | 0.622224  | -1.522439 | 0.198841  |
| C      | 2.032362  | -1.534573 | -0.417835 |
| C      | 2.639262  | -0.16935  | -0.052253 |
| N      | 1.415451  | 0.680554  | -0.020346 |
| C      | 0.149062  | -0.068933 | 0.051926  |
| H      | 0.663894  | -1.790665 | 1.259128  |
| H      | 1.968551  | -1.625737 | -1.507563 |
| H      | 2.643859  | -2.359652 | -0.044462 |
| O      | 1.465736  | 1.958813  | 0.086694  |
| C      | 3.273879  | -0.161951 | 1.345868  |
| H      | 4.203915  | -0.739359 | 1.337741  |
| H      | 2.600615  | -0.598427 | 2.090847  |
| H      | 3.503803  | 0.865246  | 1.647058  |
| C      | 3.614106  | 0.370721  | -1.094653 |
| H      | 4.495834  | -0.276138 | -1.142325 |
| H      | 3.942771  | 1.381008  | -0.831777 |
| H      | 3.151946  | 0.399358  | -2.086598 |
| C      | -0.707598 | 0.429379  | 1.221212  |
| H      | -0.252823 | 0.160858  | 2.17767   |
| H      | -0.80823  | 1.519119  | 1.174004  |
| C      | -0.653895 | 0.16105   | -1.241879 |
| H      | -0.160556 | -0.30975  | -2.095407 |
| H      | -0.735612 | 1.237759  | -1.433642 |
| O      | -1.93871  | -0.452457 | -1.139883 |
| O      | -1.982697 | -0.214598 | 1.192363  |
| C      | -2.72112  | -0.022119 | -0.019424 |
| C      | -3.893998 | -0.983685 | 0.055738  |
| H      | -3.524718 | -2.006377 | 0.175106  |
| H      | -4.487784 | -0.923214 | -0.860344 |
| H      | -4.53243  | -0.732335 | 0.906971  |
| C      | -3.179531 | 1.427595  | -0.178481 |
| H      | -2.348021 | 2.133786  | -0.228848 |
| H      | -3.810589 | 1.704984  | 0.670815  |
| H      | -3.765873 | 1.523612  | -1.096828 |

**Et in water (the most stable conformer)**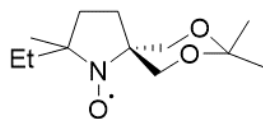

B3LYP-D3(BJ)/6-311G\*\*/smd=water//B3LYP-D3(BJ)/6-31G\*/smd=water

Electronic Energy (EE) = -751.168437 a.u.

EE + Thermal Free Energy Correction = -750.877721 a.u.

## Cartesian coordinates

| Symbol | X         | Y         | Z         |
|--------|-----------|-----------|-----------|
| H      | -0.58079  | 1.775166  | 1.119465  |
| C      | -0.463521 | 0.706311  | 1.317205  |
| C      | -1.824493 | 0.050584  | 1.625693  |
| C      | -2.416875 | -0.396874 | 0.272122  |
| N      | -1.20533  | -0.436333 | -0.592247 |
| C      | 0.040119  | 0.00117   | 0.052178  |
| H      | 0.245968  | 0.595062  | 2.139959  |
| H      | -2.497494 | 0.733124  | 2.150447  |
| H      | -1.681144 | -0.827827 | 2.26223   |
| O      | -1.22932  | -0.922397 | -1.780419 |
| C      | -3.027526 | -1.799302 | 0.337379  |
| H      | -3.894273 | -1.794615 | 1.006081  |
| H      | -2.298951 | -2.521127 | 0.720998  |
| H      | -3.356065 | -2.127471 | -0.653531 |
| C      | -3.435251 | 0.587732  | -0.338588 |
| H      | -4.341494 | 0.544976  | 0.277286  |
| H      | -3.706221 | 0.202184  | -1.329026 |
| C      | 0.910283  | -1.230961 | 0.368114  |
| H      | 0.453391  | -1.837331 | 1.153766  |
| H      | 1.011979  | -1.844266 | -0.535256 |
| C      | 0.842523  | 0.904666  | -0.888441 |
| H      | 0.334915  | 1.860918  | -1.034181 |
| H      | 0.962764  | 0.419207  | -1.863053 |
| O      | 2.106974  | 1.210101  | -0.296335 |
| O      | 2.18136   | -0.822098 | 0.872089  |
| C      | 2.91048   | 0.066644  | 0.015876  |
| C      | 4.063983  | 0.589347  | 0.853519  |
| H      | 3.675045  | 1.091146  | 1.744205  |
| H      | 4.658322  | 1.300153  | 0.273137  |
| H      | 4.708251  | -0.23841  | 1.162093  |
| C      | 3.397654  | -0.64372  | -1.247443 |
| H      | 2.580491  | -1.035521 | -1.856688 |
| H      | 4.0459    | -1.4795   | -0.968888 |
| H      | 3.973218  | 0.056944  | -1.859328 |
| C      | -2.961911 | 2.034893  | -0.468385 |
| H      | -3.737386 | 2.643799  | -0.945986 |
| H      | -2.057939 | 2.10703   | -1.083457 |
| H      | -2.746075 | 2.482906  | 0.507396  |

***n*Pr in water (the most stable conformer)**

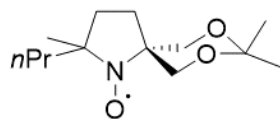

B3LYP-D3(BJ)/6-311G\*\*/smd=water//B3LYP-D3(BJ)/6-31G\*/smd=water

Electronic Energy (EE) = -790.496884 a.u.

EE + Thermal Free Energy Correction = -790.180000 a.u.

Cartesian coordinates

| Symbol | X         | Y         | Z         |
|--------|-----------|-----------|-----------|
| H      | 0.354099  | -1.531181 | 1.113009  |
| C      | 0.122687  | -0.485108 | 1.335534  |
| C      | 1.411016  | 0.301756  | 1.636853  |
| C      | 1.964012  | 0.701809  | 0.259041  |
| N      | 0.691876  | 0.887768  | -0.494014 |
| C      | -0.469752 | 0.19563   | 0.091414  |
| H      | -0.581861 | -0.470503 | 2.169757  |
| H      | 2.129756  | -0.283945 | 2.21398   |
| H      | 1.178846  | 1.207317  | 2.207898  |
| O      | 0.649701  | 1.427364  | -1.658526 |
| C      | 2.744687  | 2.012647  | 0.267335  |
| H      | 3.624389  | 1.920987  | 0.910052  |
| H      | 2.124116  | 2.826946  | 0.65439   |
| H      | 3.080061  | 2.275846  | -0.740747 |
| C      | 2.746899  | -0.438824 | -0.432276 |
| H      | 2.847513  | -0.174518 | -1.492628 |
| H      | 2.140418  | -1.352826 | -0.393397 |
| C      | -1.55593  | 1.225445  | 0.446888  |
| H      | -1.233385 | 1.861908  | 1.274405  |
| H      | -1.760075 | 1.859324  | -0.424417 |
| C      | -1.075202 | -0.781184 | -0.923285 |
| H      | -0.396627 | -1.617436 | -1.106648 |
| H      | -1.261983 | -0.266023 | -1.872009 |
| O      | -2.273745 | -1.348457 | -0.391919 |
| O      | -2.734582 | 0.556832  | 0.897278  |
| C      | -3.276875 | -0.393122 | -0.02802  |
| C      | -4.32286  | -1.172498 | 0.749357  |
| H      | -3.855271 | -1.660625 | 1.609457  |
| H      | -4.775619 | -1.934421 | 0.109182  |
| H      | -5.107182 | -0.498515 | 1.104262  |
| C      | -3.873511 | 0.297108  | -1.255453 |
| H      | -3.136563 | 0.869109  | -1.823353 |
| H      | -4.663784 | 0.983131  | -0.937018 |
| H      | -4.308275 | -0.454572 | -1.920598 |
| C      | 4.130472  | -0.7316   | 0.15541   |
| H      | 4.047961  | -0.905085 | 1.23601   |
| H      | 4.78249   | 0.140454  | 0.027912  |
| C      | 4.780266  | -1.949313 | -0.504259 |
| H      | 5.770985  | -2.148738 | -0.079932 |
| H      | 4.902793  | -1.795228 | -1.583328 |
| H      | 4.167628  | -2.848175 | -0.364034 |

**c-Pr in water (the most stable conformer)**

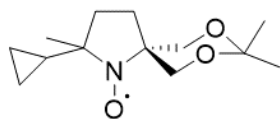

B3LYP-D3(BJ)/6-311G\*\*/smd=water//B3LYP-D3(BJ)/6-31G\*/smd=water

Electronic Energy (EE) = -789.249085 a.u.

EE + Thermal Free Energy Correction = -788.952280 a.u.

Cartesian coordinates

| Symbol | X         | Y         | Z         |
|--------|-----------|-----------|-----------|
| C      | -3.634132 | -1.425413 | 0.521534  |
| C      | -2.880023 | -1.795911 | -0.73492  |
| C      | -3.233526 | -0.357638 | -0.461286 |
| C      | 3.492237  | -0.383416 | 1.453261  |
| C      | 4.28556   | -0.126038 | -0.929713 |
| C      | 3.083897  | -0.150675 | -0.001822 |
| C      | 0.938268  | -1.240269 | 0.103742  |
| C      | 1.145738  | 1.209672  | 0.431052  |
| C      | -2.838788 | 1.825987  | 0.69728   |
| C      | 0.223582  | 0.097786  | -0.108571 |
| N      | -1.049286 | 0.128436  | 0.632548  |
| C      | -2.193551 | 0.711872  | -0.126475 |
| C      | -1.484402 | 1.230744  | -1.395842 |
| C      | -0.224589 | 0.361467  | -1.549386 |
| H      | -3.090252 | -1.47357  | 1.459873  |
| H      | -4.686886 | -1.684246 | 0.592     |
| H      | -1.844863 | -2.102434 | -0.621439 |
| H      | -3.414019 | -2.306877 | -1.531087 |
| H      | -4.037573 | 0.055999  | -1.066378 |
| H      | 2.642762  | -0.391369 | 2.139449  |
| H      | 4.176499  | 0.409709  | 1.768255  |
| H      | 4.007319  | -1.344822 | 1.536222  |
| H      | 3.953119  | 0.037531  | -1.958948 |
| H      | 4.96539   | 0.679991  | -0.640784 |
| H      | 4.821673  | -1.077282 | -0.873758 |
| O      | 2.435922  | 1.116102  | -0.170981 |
| O      | 2.237445  | -1.197175 | -0.489839 |
| H      | 0.405713  | -2.051363 | -0.39749  |
| H      | 1.20358   | 1.134298  | 1.522896  |
| H      | 0.76083   | 2.197979  | 0.169243  |
| H      | -2.104313 | 2.597594  | 0.949964  |
| H      | -3.641824 | 2.288913  | 0.114853  |
| H      | 0.994079  | -1.4658   | 1.17475   |
| O      | -1.090436 | -0.082176 | 1.89935   |
| H      | -1.20327  | 2.279182  | -1.252107 |
| H      | -2.138303 | 1.1746    | -2.269216 |
| H      | -0.463404 | -0.585406 | -2.042382 |
| H      | 0.560339  | 0.856453  | -2.124956 |
| H      | -3.266663 | 1.428847  | 1.621838  |



**Vin in water (the most stable conformer)**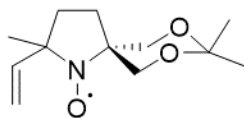

B3LYP-D3(BJ)/6-311G\*\*/smd=water//B3LYP-D3(BJ)/6-31G\*/smd=water

Electronic Energy (EE) = -749.927662 a.u.

EE + Thermal Free Energy Correction = -749.659561 a.u.

## Cartesian coordinates

| Symbol | X         | Y         | Z         |
|--------|-----------|-----------|-----------|
| H      | -0.572975 | 1.962954  | 0.450487  |
| C      | -0.51994  | 1.035934  | 1.027675  |
| C      | -1.929309 | 0.581675  | 1.448342  |
| C      | -2.463736 | -0.205344 | 0.246478  |
| N      | -1.20019  | -0.851995 | -0.225354 |
| C      | 0.01673   | -0.102378 | 0.141082  |
| H      | 0.13381   | 1.211658  | 1.884567  |
| H      | -2.577375 | 1.414915  | 1.72541   |
| H      | -1.870883 | -0.095222 | 2.306875  |
| O      | -1.190822 | -1.773735 | -1.117099 |
| C      | -3.488761 | -1.279489 | 0.604585  |
| H      | -4.39829  | -0.802397 | 0.981673  |
| H      | -3.092788 | -1.945141 | 1.378508  |
| H      | -3.749701 | -1.876675 | -0.274068 |
| C      | -2.973644 | 0.641743  | -0.905534 |
| H      | -3.11468  | 0.074594  | -1.82531  |
| C      | 0.980034  | -1.036823 | 0.890412  |
| H      | 0.580123  | -1.297769 | 1.873293  |
| H      | 1.12351   | -1.95746  | 0.312393  |
| C      | 0.734724  | 0.39042   | -1.121935 |
| H      | 0.147613  | 1.16524   | -1.620252 |
| H      | 0.880999  | -0.443619 | -1.816787 |
| O      | 1.977314  | 0.99497   | -0.761512 |
| O      | 2.21916   | -0.369869 | 1.131114  |
| C      | 2.868811  | 0.134455  | -0.042633 |
| C      | 3.988786  | 1.028449  | 0.459329  |
| H      | 3.572804  | 1.824001  | 1.084346  |
| H      | 4.517369  | 1.476939  | -0.386142 |
| H      | 4.699071  | 0.443702  | 1.050021  |
| C      | 3.39493   | -0.998352 | -0.924738 |
| H      | 2.603188  | -1.654166 | -1.293049 |
| H      | 4.101776  | -1.605319 | -0.351693 |
| H      | 3.915761  | -0.573804 | -1.787882 |
| C      | -3.243816 | 1.946181  | -0.884109 |
| H      | -3.117486 | 2.560027  | 0.003513  |
| H      | -3.614566 | 2.451749  | -1.772162 |

Ph in water (the most stable conformer)

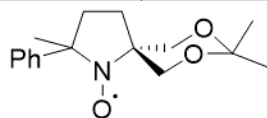

B3LYP-D3(BJ)/6-311G\*\*/smd=water//B3LYP-D3(BJ)/6-31G\*/smd=water

Electronic Energy (EE) = -903.640394 a.u.

EE + Thermal Free Energy Correction = -903.327008 a.u.

Cartesian coordinates

| Symbol | X         | Y         | Z         |
|--------|-----------|-----------|-----------|
| H      | -0.137321 | -0.507053 | -1.764622 |
| C      | 0.286862  | 0.45708   | -1.466859 |
| C      | -0.823254 | 1.512671  | -1.344231 |
| C      | -1.451165 | 1.24516   | 0.03909   |
| N      | -0.24286  | 0.824848  | 0.793214  |
| C      | 0.87073   | 0.356023  | -0.050641 |
| H      | 1.052032  | 0.731493  | -2.195814 |
| H      | -1.555762 | 1.448395  | -2.150246 |
| H      | -0.395885 | 2.521074  | -1.348831 |
| O      | -0.191531 | 0.792192  | 2.07456   |
| C      | -2.057635 | 2.487486  | 0.693354  |
| H      | -2.917844 | 2.82772   | 0.110369  |
| H      | -1.321548 | 3.296352  | 0.736253  |
| H      | -2.395856 | 2.260982  | 1.708196  |
| C      | 2.082074  | 1.283506  | 0.156861  |
| H      | 1.891144  | 2.270254  | -0.271814 |
| H      | 2.273184  | 1.398838  | 1.230039  |
| C      | 1.289581  | -1.062468 | 0.356317  |
| H      | 0.518435  | -1.786127 | 0.084514  |
| H      | 1.446948  | -1.106518 | 1.439782  |
| O      | 2.465826  | -1.442499 | -0.359107 |
| O      | 3.223853  | 0.768581  | -0.527103 |
| C      | 3.585401  | -0.570672 | -0.167444 |
| C      | 4.624729  | -1.004077 | -1.186013 |
| H      | 4.205073  | -0.936671 | -2.193922 |
| H      | 4.930553  | -2.035999 | -0.993656 |
| H      | 5.504964  | -0.358821 | -1.121461 |
| C      | 4.123434  | -0.644712 | 1.261965  |
| H      | 3.395636  | -0.322171 | 2.009566  |
| H      | 5.007087  | -0.006087 | 1.349538  |
| H      | 4.411131  | -1.675417 | 1.488403  |
| C      | -2.477502 | 0.106097  | -0.008169 |
| C      | -4.424118 | -1.923488 | -0.131699 |
| C      | -2.354173 | -1.048014 | 0.77317   |
| C      | -3.593538 | 0.233403  | -0.847937 |
| C      | -4.559146 | -0.770411 | -0.909321 |
| C      | -3.319491 | -2.056719 | 0.708954  |
| H      | -1.511138 | -1.163041 | 1.444075  |
| H      | -3.710192 | 1.124968  | -1.457105 |
| H      | -5.415513 | -0.652888 | -1.567271 |
| H      | -3.203574 | -2.946442 | 1.321349  |
| H      | -5.173468 | -2.708166 | -0.181007 |

**Py in water (the most stable conformer)**

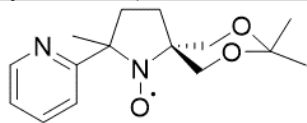

B3LYP-D3(BJ)/6-311G\*\*/smd=water//B3LYP-D3(BJ)/6-31G\*/smd=water

Electronic Energy (EE) = -919.445469 a.u.

EE + Thermal Free Energy Correction = -919.141919 a.u.

Cartesian coordinates

| Symbol | X         | Y         | Z         |
|--------|-----------|-----------|-----------|
| H      | -0.142271 | -0.553793 | -1.741734 |
| C      | 0.270767  | 0.424493  | -1.475074 |
| C      | -0.850937 | 1.472403  | -1.39446  |
| C      | -1.471774 | 1.251188  | -0.004021 |
| N      | -0.259837 | 0.887162  | 0.769932  |
| C      | 0.850892  | 0.376469  | -0.053209 |
| H      | 1.037041  | 0.679985  | -2.209619 |
| H      | -1.592978 | 1.363522  | -2.185326 |
| H      | -0.43712  | 2.485115  | -1.439543 |
| O      | -0.20269  | 0.92564   | 2.050692  |
| C      | -2.128876 | 2.491835  | 0.598845  |
| H      | -3.002678 | 2.764378  | 0.001539  |
| H      | -1.426797 | 3.331261  | 0.602626  |
| H      | -2.454809 | 2.295336  | 1.62408   |
| C      | 2.071722  | 1.297306  | 0.118579  |
| H      | 1.889974  | 2.27112   | -0.342479 |
| H      | 2.270618  | 1.444672  | 1.186483  |
| C      | 1.256435  | -1.027558 | 0.412538  |
| H      | 0.475769  | -1.75399  | 0.177211  |
| H      | 1.421087  | -1.024948 | 1.495907  |
| O      | 2.423543  | -1.451423 | -0.292906 |
| O      | 3.201885  | 0.745011  | -0.555334 |
| C      | 3.55386   | -0.583719 | -0.149396 |
| C      | 4.575034  | -1.066678 | -1.164012 |
| H      | 4.140283  | -1.036008 | -2.167321 |
| H      | 4.874465  | -2.092925 | -0.934833 |
| H      | 5.460768  | -0.426197 | -1.138118 |
| C      | 4.109187  | -0.608519 | 1.275105  |
| H      | 3.389873  | -0.260233 | 2.019355  |
| H      | 4.99391   | 0.032359  | 1.329693  |
| H      | 4.399652  | -1.630993 | 1.533348  |
| C      | -2.465091 | 0.080578  | -0.013159 |
| C      | -4.334481 | -1.925755 | -0.132389 |
| N      | -3.433653 | 0.157904  | -0.941483 |
| C      | -2.384652 | -0.975526 | 0.898953  |
| C      | -3.333306 | -1.995206 | 0.833484  |
| C      | -4.340789 | -0.827904 | -0.98996  |
| H      | -1.603489 | -0.999629 | 1.648092  |
| H      | -3.287723 | -2.828603 | 1.52814   |
| H      | -5.108613 | -0.733369 | -1.754611 |
| H      | -5.09239  | -2.696794 | -0.222591 |
